# 1 **Systematic genome-wide querying of coding and non-coding** 2 **functional elements in *E. coli* using CRISPRi**

3  
4 **Harneet S. Rishi,<sup>1,2</sup> Esteban Toro,<sup>3</sup> Honglei Liu,<sup>4</sup> Xiaowo Wang,<sup>4,5</sup> Lei S. Qi,<sup>6,7,8</sup> Adam P. Arkin<sup>3,9,\*</sup>**

5  
6 <sup>1</sup> Biophysics Graduate Group, University of California - Berkeley, Berkeley, CA, 94720, USA

7 <sup>2</sup> Designated Emphasis Program in Computational and Genomic Biology, University of California -  
8 Berkeley, Berkeley, CA, 94720, USA

9 <sup>3</sup> Department of Bioengineering, University of California - Berkeley, Berkeley, CA, 94720, USA

10 <sup>4</sup> Bioinformatics Division, Center for Synthetic and Systems Biology, Tsinghua National Laboratory for  
11 Information Science and Technology

12 <sup>5</sup> Department of Automation, Tsinghua University

13 <sup>6</sup> Department of Bioengineering, Stanford University, Stanford, CA, 94305, USA

14 <sup>7</sup> Department of Chemical and Systems Biology, Stanford University, Stanford, CA, 94305, USA

15 <sup>8</sup> Stanford ChEM-H, Stanford University, Stanford, CA 94305, USA

16 <sup>9</sup> Environmental Genomics and Systems Biology Division, Lawrence Berkeley National Laboratory,  
17 Berkeley, CA, 94720, USA

18  
19 \*Correspondence: [aparkin@lbl.gov](mailto:aparkin@lbl.gov)

## 20 21 **ABSTRACT**

22  
23 Genome-wide repression screens using CRISPR interference (CRISPRi) have enabled the high-throughput  
24 identification of essential genes in bacteria. However, there is a lack of functional studies leveraging  
25 CRISPRi to systematically explore targeting of both the coding and non-coding genome in bacteria. Here  
26 we perform CRISPRi screens in *Escherichia coli* MG1655 K-12 targeting ~13,000 genomic features,  
27 including nearly all protein-coding genes, non-coding RNAs, promoters, and transcription factor binding  
28 sites (TFBSs) using a ~33,000-member sgRNA library, which represents the most compact and  
29 comprehensive genome-wide CRISPRi library in *E. coli* to date. Our data reveal insights into the conditional  
30 essentiality of the genome with key refinements to screen design and profiling. First, we demonstrate that  
31 strong fitness defects associated with essential cellular processes can be resolved using inducible time-  
32 series measurements. We show that knockdowns of different classes of genes exhibit distinct, transient  
33 responses that are correlated to gene function with genes involved in translation exhibiting the strongest  
34 responses. We also query feature essentiality across several biochemical conditions and show that several  
35 genes, sRNAs, and operons exhibit conditional phenotypes not reported by previous high-throughput  
36 efforts. Second, we evaluate systematically targeting non-genic features (promoters and TFBSs) in the *E.*  
37 *coli* genome. We show that promoter-targeting guides can be used to add phenotypic confidence to  
38 promoter annotations and verify computationally predicted promoters. In contrast to prior studies, we find  
39 that promoter knockdowns exhibit a strong targeting orientation dependency where targeting the non-  
40 template strand of the promoter closest to the target gene is more effective in knocking down gene  
41 expression than other promoter targeting orientations. Unlike eukaryotic genomes, we note that interpreting  
42 the effects of TFBS targeting is particularly challenging due to the small size of such features and their  
43 proximity to and overlap with other genomic features. Together, this work reveals novel conditionally  
44 essential gene phenotypes, provides a characterized set of sgRNAs for future *E. coli* CRISPRi screens,  
45 and highlights considerations for CRISPRi library design and screening for microbial genome  
46 characterization.

49  
50  
51  
52  
53  
54  
55  
56  
57  
58  
59  
60  
61  
62  
63  
64  
65  
66  
67  
68  
69  
70  
71  
72  
73  
74  
75  
76  
77  
78  
79  
80  
81

## INTRODUCTION

The nuclease deactivated dCas9 protein has been developed as a powerful tool for programmable gene repression<sup>1</sup>, and the ability to induce genetic perturbation at a user-defined time – a feature not available in conventional gene disruption or deletion techniques – has enabled the CRISPRi-mediated characterization of essential genes in a number of bacteria<sup>2-7</sup>. The programmability of CRISPRi targeting also enables the interrogation of smaller non-coding DNA (ncDNA) features such as non-coding RNA (ncRNA) genes, promoters, and transcription factor binding sites (TFBSs). ncDNA features, which represent ~12 percent of the *E. coli* genome, play important roles in the regulation of gene expression in a condition-dependent manner. For example, small RNAs (sRNAs) have been implicated in transient regulatory processes involving membrane biogenesis, metabolism, and the synthesis of key transcription factors<sup>8</sup> while ncDNA regulatory elements drive key physiological decisions such as complex metabolism<sup>9</sup>, pathogenicity<sup>10</sup>, and gene expression diversification<sup>11</sup>. However, ncDNA features have been difficult to perturb using traditional genome-scale methods (e.g. targeted modifications using  $\lambda$ -Red recombination<sup>12-16</sup>, random insertions using transposon elements<sup>17-20</sup>) due to the random targeting of transposons and disruption of local genomic context by insertions, making their interrogation via CRISPRi highly valuable.

Despite this potential value-add, previous bacterial CRISPRi screening studies have been limited in their investigation of RNA genes beyond simple cases (e.g. tRNA, rRNA genes) and have rarely addressed non-coding genomic features such as promoters and TFBSs. In comparison, CRISPRi screens in eukaryotic systems have been routinely employed to find new regulatory sites in enhancer regions<sup>21-23</sup> and functionally profile lncRNAs<sup>24-27</sup>, indicating the untapped potential of CRISPRi for the functional characterization of bacterial genomes. In addition, existing CRISPRi screens measure phenotypes using end-point fitness measurements by calculating the change in strain abundance between the beginning and end of a screen, which ignores dynamic outcomes that may occur over the course of an experiment. However, the physiological response resulting from CRISPRi-mediated gene repression could vary between different genes, arising from differences in protein and mRNA decay rates, feedback regulation, interaction network structure, and the physiological relevance of the targeted gene itself. Resolving such end-point measurements by tracking transient responses upon CRISPRi knockdown can yield rich insights into the primacy of processes for fitness and highlight the time it takes to demonstrate a physiological effect in different environments.

82 Here we leverage the programmable nature of CRISPRi to target approximately 13,000 *E. coli* MG1655 K-12 genomic features (protein-coding genes, non-coding RNAs (ncRNAs), promoters, and TFBSs) using a compact, designed oligo array library of 32,992 sgRNAs. We first validated our technology by showing that we could knock down 90% of essential genes (as annotated by the Profiling of *E. coli* Chromosome - PEC - database<sup>28,29</sup>) in a pooled screen with the entire library. Through this process, we showed that a designed, compact library with ~4 guides/gene is sufficient for probing gene essentiality, which represents a considerable reduction in comparison to a previous designed *E. coli* screening study using 15 guides/gene<sup>4</sup>. Given that gene essentiality is context-dependent, we expected that querying essentiality under a variety of biochemical conditions would allow us to delineate between a core set of essential genes and an accessory set of conditionally-essential genes. We thus leveraged the inducible nature of CRISPRi to propagate strains targeting essential genomic features and assay the library in several conditions to find condition-dependent phenotypes for essential genes and ncRNAs. Having validated the library, we next investigated if endpoint phenotypes could be further resolved by investigating how different genomic features respond upon CRISPRi induction. We used time-series measurements to track the dynamic response of genes in our library to CRISPRi perturbation and showed that essential genes exhibited distinct

97 profiles that were correlated with their physiological function – a phenomenon not reported from previous  
98 CRISPRi screens due to their use of only endpoint measurements of fitness.

99  
100 Finally, we studied the physiological effects of perturbing DNA regulatory elements such as promoters and  
101 TFBSs as these features have been understudied in previous bacterial CRISPRi screens. We showed that  
102 targeting promoters of essential genes could knock down gene expression and used this phenotypic  
103 outcome to add annotation strength to RegulonDB promoters. We also showed that perturbing gene  
104 expression was more successful when inhibiting transcription elongation (gene targeting CRISPRi) as  
105 opposed to inhibiting transcription initiation (promoter targeting CRISPRi) in our library through a  
106 comparison of guides targeting the promoter and gene sequences of known essential genes. By analyzing  
107 differences in sgRNA design features and the genomic context of targeted promoters, we found targeting  
108 the non-template strand of the promoter closest to the target gene was more effective in knocking down  
109 gene expression than other promoter targeting orientations, indicating a new design consideration for  
110 promoter CRISPRi. Finally, we looked at the effect of dCas9 targeting to TFBSs to see if TFBS-targeted  
111 CRISPRi could perturb gene expression. We analyzed TFBSs regulating promoters of essential genes;  
112 however, due to the proximity or overlap of targeted TFBSs with promoters we were unable to associate  
113 phenotypes to specific TFBS features in most cases – finding only one case of a condition-dependent  
114 phenotype for a TFBS cluster regulating the expression of a conditionally-essential aerobic respiration  
115 gene. Together, this work represents an extension and characterization of bacterial CRISPRi screens as  
116 well as a framework for the design, construction, pooled screening, and analysis of CRISPRi libraries for  
117 the high-throughput functional annotation of bacterial genomic features.

## 118 119 **RESULTS**

### 120 121 **Design and Construction of CRISPRi Library**

122 We designed a CRISPRi library consisting of 32,992 unique sgRNAs to target 4,457 genes (including 130  
123 small RNAs; sRNAs) and gene-like elements (e.g. insertion elements / prophages), 7,442 promoters and  
124 transcription start sites (TSSs), and 1,060 transcription factor binding sites (TFBS) across the *E. coli* K-12  
125 MG1655 genome using bioinformatic and biophysical design constraints (Fig. 1a, see [Supplementary Note](#)  
126 [1](#) for design details, [Supplementary Table 1a](#) for sequences). In brief, guides were designed to target  
127 proximal to a protospacer adjacent motif (PAM) site (NGG for *S. pyogenes* dCas9 used in this work), target  
128 a unique genomic sequence, maintain the secondary structure of the sgRNA, and avoid extreme GC  
129 content (GC < 20%, GC > 80%), where possible. Gene-targeting guides were designed to target the non-  
130 template strand and target close to the beginning of the gene, following previous observations<sup>1,30</sup>. When  
131 possible, multiple guides were designed for each feature. The designed sgRNAs were synthesized as an  
132 oligo pool ([Supplementary Table 1b](#)). To allow for the screening of smaller, more focused libraries the  
133 terminal 3' end of each oligo was designed with a category code that allows for the amplification of subsets  
134 from the oligo library (Fig. 1b, [Supplementary Table 1c](#)). To construct the genome-wide library, sgRNAs  
135 were PCR amplified from the oligo pool and then cloned into an expression vector using a golden gate  
136 assembly strategy ([Methods](#)). This expression vector (ColE1 origin) maintains the guides under arabinose-  
137 inducible control using a pBad promoter. The sgRNA library assembly was transformed into a strain  
138 harboring a genomically-encoded dCas9 under aTc-inducible control using a pTet promoter.

139  
140 The identity of each knockdown strain in the library is determined solely by the sgRNA plasmid it harbors,  
141 specifically the 20 base pair variable region of the sgRNA that directs dCas9 targeting and encodes a DNA  
142 barcode for the strain. The relative abundance of every sgRNA, and by extension every strain, can be  
143 measured by amplicon sequencing of the variable sgRNA region from a plasmid DNA extraction of the  
144 sgRNA library. To perform a pooled functional screen the library is induced to express dCas9 and the  
145 sgRNAs and grown under selection for a short period of time (e.g. 24 population doublings) in a user-

146 defined experimental condition (Fig. 1c, Methods). During this competition, strains that carry an sgRNA  
147 targeting a feature important for growth will decrease in abundance in the pool. This phenotypic outcome  
148 can be quantified by measuring the starting and ending frequency of each strain and calculating a fitness  
149 score, which is defined as the normalized log<sub>2</sub> ratio of the relative abundance of the guide-strain after the  
150 experiment to before the experiment (Methods). For gene targeting guides, we also define a composite  
151 gene fitness score as the median of fitness scores for all guides targeting a gene.

### 152 153 **Technology Validation of Genome-Wide CRISPRi Gene Knockdowns**

154 To assess the ability of the library to yield biologically meaningful results, we profiled the phenotypic effect  
155 of knockdown for all genes in the library via a fitness experiment in LB Lennox rich media (LB). We found  
156 that CRISPRi was highly reproducible (Pearson  $r_{\text{biological}} = 0.90$ ,  $p < 0.05$ , permutation test; Pearson  $r_{\text{technical}}$   
157  $= 0.96$ ,  $p < 0.05$ , permutation test) (Supplementary Fig. 1). Furthermore, we observed that sgRNAs  
158 targeting known essential genes were severely depleted (i.e. strains harboring these guides exhibited a  
159 strong growth defect) over the course of an experiment when compared with sgRNAs targeting non-  
160 essential genes (Fig. 2a). We compared the fitness results with the Profiling of *E. coli* Chromosome (PEC)  
161 database, which reports 304 *E. coli* K-12 MG1655 genes for which a knockout could not be generated,  
162 implying that these genes were essential for growth in LB rich medium under aerobic conditions (i.e. the  
163 condition of library construction)<sup>28,29</sup>. sgRNAs targeting 274 of 303 (~90%) essential genes were severely  
164 depleted (composite gene fitness  $\leq -2$ ) over the course of CRISPRi fitness experiments in the same  
165 condition, yielding 90 percent agreement with the PEC database. This also included proper depletion of all  
166 essential *E. coli* ncRNAs assayed in the experiment as well. Of the remaining 29 essential genes, 15 had  
167 at least one sgRNA with fitness  $\leq -2$  and an additional six had at least one sgRNA with fitness  $\leq -1$   
168 (Supplementary Table 2). Overall, we found that 289 of 303 essential genes (~95%) could be knocked  
169 down by at least one designed sgRNA with fitness  $\leq -2$ , indicating high activity of the CRISPRi library. We  
170 also tested the library in M9 minimal medium (M9) under aerobic conditions and found that 385 out of 415  
171 (93%) minimal media essential genes had a gene fitness score  $\leq -2$  when knocked down (Supplementary  
172 Fig. 2).

173  
174 We also measured the tightness of inducible control for the CRISPRi library by growing it with no inducer  
175 (i.e. no aTc or arabinose added to turn on expression of *dCas9* and sgRNA) for the same period of time as  
176 a regular fitness experiment (24 population doublings). Strains with essential gene-targeting sgRNAs  
177 exhibited a negligible growth defect in this uninduced condition (with gene fitness scores near 0), and the  
178 fitness defect of essential gene strains was significantly different between this uninduced case and an  
179 induced case ( $p < 0.001$ , Mann-Whitney U-test; Cohen's  $d$  effect size = 3.7) (Fig. 2b). This suggested that  
180 library strains with sgRNAs targeting essential genomic features can be maintained when the library is  
181 propagated in an uninduced state.

182  
183 We also checked if fitness was biased by factors such as position of targeting relative to chromosomal  
184 origin, GC content of the sgRNA, or chromosomal strand of the targeted gene and found no significant  
185 correlation (Supplementary Fig. 3). In agreement with prior reports of CRISPRi in bacteria<sup>2,4-6</sup>, we found  
186 CRISPRi-mediated polar operon effects where knockdown of an upstream nonessential gene in an  
187 essential gene containing operon produced a growth defect similar to the essential gene itself, indicating  
188 that CRISPRi can knockdown entire operons (Fig. 2c). Out of 160 operons containing at least one essential  
189 gene targeted in our library, we focused on 47 operons where the essential gene was not the first gene in  
190 the operon to assess the prevalence of polar operon effects. We found operon effects to be highly prevalent,  
191 with every non-essential gene (based on PEC database) upstream of the essential gene in 38 out of the 47  
192 operons exhibiting a growth defect when targeted with *dCas9* (Fig. 2d).

193  
194



## 195 **CRISPRi Screening of Essential Genes Under Various Environmental Conditions**

196 To evaluate whether CRISPRi could assess feature fitness in a condition-specific manner, we compared  
197 feature enrichment in the library by varying two physiologically relevant parameters – nutrient availability  
198 and oxygen availability. In the case of nutrient availability, we profiled the CRISPRi library in M9 media, M9  
199 media supplemented with casamino acids (M9Ca), and LB media under aerobic growth conditions. In the  
200 case of oxygen availability, we profiled the CRISPRi library in LB media under aerobic and anaerobic growth  
201 conditions.

202  
203 We first compared enrichment between varied nutrient availability conditions (LB, M9Ca, M9). As previously  
204 discussed, we saw a strong depletion of sgRNAs targeting known essential genes (based on knockout  
205 studies) in LB and M9 media. We next analyzed non-essential genes that should exhibit condition-  
206 dependent phenotypes between these conditions by comparing the enrichment of known amino acid  
207 metabolism genes for expected auxotrophic phenotypes. We found a strong depletion of guides targeting  
208 genes involved in amino acid biosynthesis in the amino acid-deficient medium (M9) but not the  
209 supplemented medium (M9Ca), indicating that CRISPRi can enrich for conditionally essential genes  
210 ([Supplementary Fig. 4](#)).

211  
212 Finally, we looked beyond phenotypes for protein-coding genes and analyzed sRNA feature enrichment.  
213 Out of the 130 sRNAs with designed guides in the library, we had fitness data for 114 in each condition  
214 (some sRNAs did not have data due to low read depth in one or more conditions). Of these 114 sRNAs,  
215 we found novel phenotypes for the *hok/sok* Type I toxin-antitoxin (TA) system, which has been implicated  
216 in bacterial persistence through the stringent response<sup>31,32</sup>. Specifically, under stress or amino acid  
217 starvation, (p)pGpp and Obg induce (via an unknown mechanism) expression of the *hokB* toxin gene, which  
218 leads to membrane depolarization and persistence<sup>33</sup>. In our CRISPRi screens, a knockdown of the *sokB*  
219 antitoxin sRNA gene resulted in a successively stronger growth defect in LB, M9Ca, and M9 media  
220 ([Supplementary Fig. 5](#)), likely due to its inability to inactivate the *hokB* toxin gene product under conditions  
221 where it is expressed. The related *hokC-sokC* system exhibited a similar, yet even stronger, response to  
222 the knockdown of antitoxin *sokC*. Previous literature has suggested that *hokC* is likely inactive due to an  
223 insertion element located 22 bp downstream of the *hokC* reading frame<sup>34</sup>. However, the *sokC* antitoxin  
224 sRNA exhibits a strong deleterious phenotype when knocked down, implying that *hokC* may still be  
225 functional. We hypothesize that this phenotype was not seen earlier because the *hokC-sokC* system had  
226 only been investigated in nutrient-rich conditions (e.g. LB); however, here we are able to uncover this  
227 phenotype by combining the programmability of CRISPRi targeting to investigate this small 55 bp feature  
228 with the ability to assess feature fitness across conditions.

229  
230 We next compared enrichment between the aerobically varied conditions, expecting to find condition-  
231 specific phenotypes for genes involved in aerobic or anaerobic growth processes. Many strains with guides  
232 targeting genes involved in aerobic respiration (eg pyruvate conversion genes, heme biosynthetic genes,  
233 ubiquinol biosynthetic genes, cytochrome *bd-I* terminal oxidase subunits, ATP synthase F<sub>1</sub> synthase  
234 complex subunits) were depleted in the aerobic condition but dispensable under anaerobic growth ([Fig.](#)  
235 [3a](#)). NADH:quinone oxidoreductase I (*nuoABCEFGHIJKLMN*; NDH-1) and NADH:quinone oxidoreductase  
236 II (*ndh*; NDH-2) showed a previously unreported phenotype ([Supplementary Fig. 6](#)). NDH-1 only exhibited  
237 a defect in aerobic minimal media conditions (M9Ca, M9) while NDH-2 only exhibited a defect in the aerobic  
238 rich media condition (LB), implying that NDH-1 may be the dominant oxidoreductase in nutrient-limited  
239 conditions and NDH-2 may be dominant in nutrient-rich conditions. We noted that seven genes (*hemB*,  
240 *hemC*, *hemD*, *hemH*, *ispB*, *nrdA*, *nrdB*) previously characterized as essential according to the Keio  
241 database of essential genes in *E. coli* K-12 BW25113<sup>12</sup> and the PEC database of essential genes in *E. coli*  
242 K-12 MG1655 were dispensable for growth under anaerobic conditions ([Fig. 3a](#)). These genes are involved  
243 in heme biosynthesis (*hemB*, *hemC*, *hemD*, *hemH*) and ubiquinol biosynthesis (*ispB*), which play critical

244 roles in the aerobic electron transport chain. The essential genes *nrdA* and *nrdB*, which are involved in  
245 aerobic nucleotide metabolism<sup>35,36</sup>, were also dispensable under anaerobic growth. We clonally verified the  
246 conditional essentiality of *nrdA* and *hemB* by showing that we could generate viable strains with deletions  
247 of these genes under anaerobic conditions and that these deletion strains were not viable under aerobic  
248 conditions (Fig. 3b-c, Supplementary Table 3). By demonstrating that these “essential” genes are only  
249 conditionally essential, we show that they are not part of the core, essential genome but instead part of the  
250 growth-supporting, conditionally-essential genome. We also noted that of the genes with conditional  
251 phenotypes in Fig. 3a, 20 were genes (genes with double asterisks in Fig. 3a) for which a gene disruption  
252 mutant was not generated during a high-throughput transposon insertion screen using Rb-TnSeq due to  
253 the attempted construction of the mutants under a condition where the underlying genes were essential.  
254 We clonally verified one of these genes, *ubiD*, by showing that we could generate a viable deletion strain  
255 under the condition determined as permissive via the CRISPRi screen (Fig. 3b-c, Supplementary Table 3).  
256 This analysis presents a proof of concept for the use of two intertwined capabilities of CRISPRi screening  
257 – the ability to induce CRISPRi to interrogate features traditionally regarded as essential and the ability to  
258 probe feature essentiality across conditions – to delineate between the core, essential and accessory,  
259 conditionally-essential genome.

260

### 261 **Time-series Measurements Elucidate Dynamic Knockdown Response to CRISPRi**

262 We next leveraged the ability to induce CRISPRi perturbations on-demand to probe the dynamic response  
263 to knockdown for the library, focusing first on essential genes, and determine if time-series data could yield  
264 further measurement resolution into essential gene phenotypes. Specifically, we grew the induced library  
265 and sequenced samples at regular intervals over a period of 18 population doublings in LB rich media  
266 (Supplementary Fig. 7). We examined the fitness of strains harboring guides targeting essential genes  
267 across the timepoints and found that these strains exhibited successively stronger growth defects over  
268 progressive time points (Fig. 4a). We next clustered the essential gene time-series data (Supplementary  
269 Note 2) and found that essential genes could be classified into one of three groups (Early, Mid, Late) based  
270 on their temporal growth trajectory (see Figure 4b for examples and Figure 4c for groupings). For example,  
271 some essential genes showed a fitness defect soon after the first few population doublings while other  
272 genes did not show a defect until several population doublings had occurred. Of the 287 essential genes  
273 analyzed, 78 were in the Early group, 114 in the Mid group, and 95 in the Late group (Supplementary Table  
274 4a).

275

276 We performed a gene ontology enrichment analysis to see if these classes were enriched for specific  
277 biological functions (Supplementary Table 4b, Supplementary Note 2). An analysis with TIGR Role  
278 ontologies<sup>37</sup> revealed that essential genes in the Early group were significantly enriched for genes involved  
279 in ribosomal protein synthesis and modification ( $p < 0.001$ , p-value from Hypergeometric test followed by  
280 FDR correction) with 32 out of 41 essential genes with this TIGR Role present in the Early group. Resource  
281 allocation studies in *E. coli* have shown that in rapidly dividing cells ribosomes are most abundant and  
282 important for growth<sup>38</sup> and haploinsufficiency studies in yeast have shown that ribosomal genes exhibit  
283 strong dose responses to gene expression perturbation in rich media<sup>39</sup>. This would support our finding of  
284 ribosomal protein synthesis and modification genes exhibiting a faster physiological response to expression  
285 knockdown (via growth defect) relative to other essential genes queried. An analysis of the Mid group  
286 revealed a strong enrichment in genes involved in tRNA aminoacylation ( $p < 0.001$ , Hypergeometric test  
287 with FDR correction) with 19 out of 22 essential genes with this TIGR Role present in the Mid group. The  
288 presence of tRNA aminoacylation genes in the Mid class also agrees with previous resource allocation  
289 studies, which report that the dosage effects observed under exponential growth are present, but less  
290 strong, for tRNA genes<sup>40,41</sup>. Finally, an analysis of the Late group revealed an enrichment of all eight  
291 essential genes involved in the 2-C-methyl-D-erythritol 4-phosphate/1-deoxy-D-xylulose 5-phosphate  
292 (MEP/DOXP) pathway ( $p < 0.05$ , Hypergeometric test with FDR correction). The MEP/DOXP pathway<sup>42</sup>

293 represents the mevalonate-independent pathway for producing the isoprenoid precursors isopentenyl  
294 pyrophosphate (IPP) and dimethylallyl pyrophosphate (DMAPP), and its presence in a later, albeit still  
295 essential class, in comparison to translation-related genes indicates that the abundance of certain pathway  
296 metabolites may not be as rate-limiting to growth in rich media as genes related to translation.

297  
298 Because the transcriptional and translational products of genes expressed prior to essential gene  
299 knockdown are still present in cells upon CRISPRi induction, we hypothesized that differences in the initial  
300 abundance and decay rate of these products may affect the time it takes to observe a measurable fitness  
301 defect. We found that genes in the Early group had higher mRNA and protein abundance and were closer  
302 to the chromosomal origin than genes in other groups ([Supplementary Fig. 8](#), [Supplementary Table 4c](#));  
303 however, these trends were largely driven by the presence of protein synthesis related genes in the Early  
304 group and likely represent correlative effects as opposed to causative drivers of group classification.

305  
306 We next analyzed all genes targeted in the library to see whether genes classified as non-essential also  
307 exhibited varied responses ([Supplementary Note 2](#)). We observed three categories after clustering, two of  
308 which contained genes exhibiting a growth defect via the knockdown of both essential and non-essential  
309 genes and a third category of genes that did not exhibit a growth defect ([Supplementary Fig. 9](#),  
310 [Supplementary Table 4d](#)). Across the two categories of genes exhibiting a defect we saw an enrichment of  
311 a number of processes including translation, transcription, aerobic respiration, and fatty acid metabolism  
312 ([Supplementary Table 4e](#)).

313  
314 The composite nature of the analyzed growth curves meant that the apparent decline in abundance of a  
315 given strain could be the result of the slower growth of that strain, the faster growth of another strain, or a  
316 combination of the two cases. To distinguish between these cases and validate the trends among essential  
317 gene classes, we chose a representative essential gene from each class (Early, Mid, Late), generated  
318 individual strains with dCas9 and sgRNAs to separately target these essential genes ([Supplementary Table](#)  
319 [5](#)), and used the eVOLVER<sup>43</sup>, an automated cell culture system, to monitor the temporal knockdown  
320 response. We also generated a strain expressing dCas9 along with an sgRNA that did not target any  
321 genomic locus to serve as a reference control. We used the eVOLVER as a turbidostat by programming it  
322 to keep cells between two optical density (OD) ranges, which allowed us to track changes in doubling time  
323 in response to CRISPRi induction. The control sgRNA strain exhibited no change in doubling time after  
324 CRISPRi induction ([Supplementary Fig. 10a](#)). In comparing the essential gene-targeting validation strains,  
325 we found that *rpsK* (Early gene) was the first to show an increase in doubling time upon induction of  
326 CRISPRi, followed by *msbA* (Mid gene) and *folC* (Late gene), thus confirming our observations from the  
327 pooled screen ([Fig. 4d](#)). We also found that even within a gene class, different genes could have different  
328 profiles. For example, *msbA* showed a progressive increase in doubling time while *ftsZ* (another Mid gene)  
329 consistently showed a halt in cell growth after a set number of doublings ([Supplementary Fig. 10b](#)).

330  
331 Having validated the trends among essential gene classes, we compared the time-series measurements  
332 from the screen to the endpoint measurements (i.e. fitness scores calculated from the initial and final time  
333 points in a screen) from an earlier screen. We found that the time-series measurements successfully  
334 enabled the further resolution of fitness for 219 essential genes via their stratification into gene classes  
335 ([Figure 4e](#)). Together, these results demonstrate (1) the increased measurement resolution provided by  
336 time-series measurements in resolving essential gene phenotypes and (2) that while CRISPRi knockdown  
337 of an essential gene eventually leads to a fitness defect, different genes can exhibit varied dynamic  
338 responses to perturbation, potentially indicating the functional importance of the genes and their biological  
339 roles as well as highlighting target considerations for CRISPRi applications where transient dynamics are  
340 important (e.g. CRISPRi-based genetic circuits).

341

## 342 **CRISPRi Screen Uncovers Design Considerations for Non-genic Targeting**

343 *Promoter Interference*: The CRISPRi library contains 14,188 sgRNAs targeting 3,237 promoters and 4205  
344 transcription start sites (TSSs) from RegulonDB ([Supplementary Table 6a](#)). To measure the efficacy of  
345 CRISPRi targeting for promoters on a genome-scale we assessed whether knockdowns of promoters  
346 regulating essential genes produced a growth defect ([Fig. 5a](#)). An analysis of 1,102 sgRNAs targeting 337  
347 essential gene promoters across experiments in rich and minimal media ([Supplementary Table 6b](#))  
348 revealed that (i) for 74% of essential gene promoters at least 1 sgRNA produced a mild knockdown  
349 phenotype (eg Fitness  $\leq -1$ ), and (b) for 51% of essential gene promoters, all sgRNAs produced a mild  
350 knockdown phenotype. Through this survey, we collected additional experimental phenotypes (i.e. a  
351 collection of fitness scores) for 141 known promoter annotations from RegulonDB, which primarily uses  
352 RNA-seq as the primary source of experimental characterization for promoters ([Supplementary Table 7](#)).  
353 We also found, to the best of our knowledge, the first phenotype-based experimental evidence for four  
354 computationally predicted promoters of essential genes ([Supplementary Table 7](#)), highlighting the utility of  
355 CRISPRi to improve the annotation strength of non-genic genomic features. We compared the fitness effect  
356 of targeting essential gene sequences to that of targeting promoter sequences of essential genes and found  
357 that targeting promoters to knockdown gene expression was less efficient than targeting the gene sequence  
358 itself ([Fig. 5b](#)). However, we did find cases where promoter-targeting produced a knockdown phenotype  
359 similar to gene-targeting knockdowns and where promoter-targeting yielded better knockdown performance  
360 than the gene knockdown ([Supplementary Fig. 11](#)), indicating the potential of promoter CRISPRi as an  
361 alternative to gene CRISPRi for control over gene expression. We also revisited the time-series data to  
362 analyze how promoter CRISPRi compared to gene CRISPRi following a perturbation. To avoid the  
363 confounding effects of multiple genes within the same transcriptional unit (TU) and multiple promoters  
364 driving the same TU, we focused on 27 monocistronic essential gene TUs regulated by a single promoter  
365 ([Supplementary Note 2](#)). We found a strong overlap between the trajectories of the two knockdown  
366 implementations ([Supplementary Figure 12](#)), which further indicated the potential of promoter CRISPRi in  
367 the presence of well-designed sgRNAs. To elucidate factors contributing to better promoter guide design,  
368 we analyzed cases where promoter CRISPRi failed. We noted that 91% of essential promoters targeted by  
369 the 334 guides that did not produce a growth defect (Fitness  $> -1$ ) either were part of a promoter array (i.e.  
370 two or more promoters in tandem regulating the same TU) or displayed a strong strand-dependency with  
371 respect to knockdown efficiency.

372  
373 We hypothesized that for cases where effective promoter knockdown was strongly dependent on the  
374 targeted strand, the sgRNAs could be targeting more effective positions within the promoter to interfere  
375 with transcriptional initiation or that the local genetic context was influencing knockdown efficacy. In the  
376 latter scenario, we hypothesized a model of “transcriptional coupling” where CRISPRi targeting of a  
377 promoter on the template strand failed to produce a fitness defect (while targeting the non-template strand  
378 could produce a defect) due to its inability to block RNAP readthrough from an upstream transcriptional  
379 event. We systematically identified 11 high-confidence cases where targeting the non-template strand  
380 produced a growth defect while targeting the template strand did not ([Fig. 5c-d](#), see [Supplementary Table](#)  
381 [7](#) for cases and scoring metrics). One explanation for this result could be the transcriptional overlap of intra-  
382 operonic promoters in operons containing multiple TUs (e.g. one TU within a larger TU). Recent reports  
383 have also suggested that the transcription boundaries of operons are not as static as previously thought  
384 with one study using long-read sequencing (SMRT-Cappable-seq) to demonstrate that 34% of RegulonDB  
385 operons can be extended by at least one gene and that 40% of transcription termination sites have read-  
386 through that alters operon content<sup>44</sup>. Indeed, of the 11 high-confidence cases, five were TUs contained  
387 within larger operons and the remaining six TUs were a part of an extended RegulonDB operon in the  
388 SMRT-Cappable seq study ([Supplementary Table 8](#)). We also found an additional 26 cases of medium-  
389 confidence ([Supplementary Table 7](#)) that are candidates for this transcriptional coupling that we could not  
390 fully confirm either due to an insufficient number of guides available in both targeting orientations to test



391 our strand hypothesis or due to cases where most, but not all, guides produced phenotypes matching the  
392 strand hypothesis (Fig. 5d, Supplementary Table 7). Of these 26 cases, 15 were TUs that were part of  
393 larger operons and seven were part of extended RegulonDB operons (Supplementary Table 8). Overall,  
394 our results suggest that targeting the non-template promoter strand can lead to a higher likelihood of  
395 successful CRISPRi knockdown for promoters in certain operonic contexts.

396  
397 We also found that targeting CRISPRi in promoter arrays can yield distinct phenotypic profiles. Out of 59  
398 tandem promoter arrays analyzed in the essential gene promoter data set, we found 40 tandem promoter  
399 arrays where we observed one of two distinct phenotypic profiles: (1) all promoters in the array produced a  
400 knockdown phenotype or (2) only the downstream promoter produced a fitness defect (Fig. 5e,  
401 Supplementary Table 7). In the case where all promoters produced a deleterious knockdown phenotype,  
402 we hypothesized that either the most upstream promoter was the primary driver of expression or that all  
403 promoters in the array were required for appropriate expression. In the case where only the downstream  
404 most promoter showed a deleterious knockdown phenotype, we hypothesized that either the downstream  
405 most promoter was the primary expression driver or that all promoters in the array are required for  
406 appropriate expression. The remaining 19 tandem promoter arrays analyzed either had an insufficient  
407 number of guides to draw any conclusions or were inconsistent with the aforementioned phenotypic profiles  
408 (Supplementary Table 7). Overall, our results showed that the promoter closest to the target gene is more  
409 likely to yield a knockdown phenotype and thus should be targeted when attempting to knockdown  
410 expression of a gene regulated by multiple promoters via promoter CRISPRi.

411  
412 *TFBS Interference:*

413 Finally, we analyzed a set of 1810 sgRNAs in the library that were designed to target 1060 TFBSs on the  
414 chromosome (Supplementary Table 9). We first focused on a subset of 175 sgRNAs that targeted 102  
415 TFBSs regulating an individual promoter controlling the expression of at least one rich media (based on  
416 PEC database) or minimal media (based on Joyce et al *J Bacteriol* 2006) essential gene. We found that  
417 most TFBS knockdowns that yielded a deleterious knockdown phenotype were present within the RNAP  
418 footprint for promoter binding, which we conservatively defined as between -60 to +20 nt relative to the  
419 transcription start site (TSS) associated with the promoter (Supplementary Fig. 13). Due to this overlap, we  
420 were unable to specifically associate such phenotypic outcomes to the TFBS alone as they could also be  
421 (and likely were) a result of promoter knockdown. Ultimately, we found that it was challenging to parse the  
422 phenotypic contribution of TFBSs due to their presence in promoters or binding site arrays with multiple  
423 diverse transcription factors.

424  
425 We next looked at all TFBSs that exhibited a growth defect when targeted across all conditions in which  
426 the library was assayed. The activating NarL TFBS regulating the *cydDC* promoter, *cydDp*, exhibited a mild  
427 condition-dependent phenotype between aerobic and anaerobic conditions in LB (Supplementary Fig. 14).  
428 sgRNAs targeting *cydD*, which plays a role in respiration, and *cydDp* exhibited a growth defect in an aerobic  
429 fitness assay in LB medium but displayed no such defect under anaerobic conditions where no terminal  
430 electron acceptor was added and thus no respiration was active. Similarly, an sgRNA targeting the NarL  
431 TFBS, which has a positive effect on gene expression for *cydDC* and is situated -126 nt from the *cydDp*  
432 TSS, exhibited a mild growth defect as well (Fitness ~ -1.5) in the aerobic condition and a negligible growth  
433 defect (Fitness ~ 0) in the anaerobic condition.

## 434 435 **DISCUSSION**

436  
437 In this work we (1) explored key refinements to screen design and profiling using a genome-wide CRISPRi  
438 library in *E. coli* and (2) used the CRISPRi platform to phenotypically interrogate the *E. coli* genome. During  
439 the preparation of this manuscript, two other studies reported the use of genome-wide CRISPRi libraries to

440 identify essential genes and genes involved in phage-host interactions in *E. coli*<sup>4,45</sup>. Our work here presents  
441 a complementary and extended demonstration of the power of CRISPRi-based approaches to interrogate  
442 microbial genomes with the discovery of novel phenotypes for essential genes using a more compact  
443 library, application of time-series measurements to track and elucidate phenotypic changes arising after  
444 CRISPRi induction, presentation of refined rules for CRISPRi targeting of promoters, and investigation of  
445 CRISPRi targeting of TFBSs.

446  
447 We leveraged the inducible nature of CRISPRi to propagate strains with sgRNAs targeting essential  
448 genomic features and query them in a number of biochemical contexts, a task unfeasible using conventional  
449 gene disruption or knockout approaches. This enabled us to generate 100s of essential gene strains not  
450 covered by conventional knockout or Tn-Seq approaches in *E. coli*. Furthermore, we showed that a number  
451 of genes classified as essential genes according to classical aerobically generated *E. coli* knockout  
452 collections or unable to be assayed using Tn-Seq approaches were actually dispensable under anaerobic  
453 conditions, representing a more comprehensive annotation of these genes. We validated the dispensability  
454 of three of these genes by showing that we could generate strains with deletions of these genes under the  
455 condition they were predicted to be dispensable from the CRISPRi screen.

456  
457 We also utilized the inducible nature of CRISPRi to track the effect of knockdown on essential genes post-  
458 induction of the CRISPRi machinery. Using time series measurements, we found that different essential  
459 gene strains displayed growth defects at distinctly different times, and our results enabled us to classify  
460 essential genes into specific categories based on how quickly a given gene's knockdown yielded a  
461 measurable fitness defect. The genes in the most essential category had a remarkable overlap with genes  
462 discovered to be most essential in other resource allocation studies of *E. coli* in the same condition and  
463 also matched gene dosage studies in yeast. Overall, our results enabled us to further resolve the strong  
464 fitness defects associated with essential gene expression perturbation, and the use of time-series  
465 measurements in future high-throughput genetic screens should yield insight into the temporal importance  
466 of essential processes in conditions of interest.

467  
468 The programmable nature of CRISPRi targeting also allowed us to interrogate promoters and TFBSs.  
469 Specifically, we were able to compare gene-targeted CRISPRi (inhibit transcription elongation) to promoter-  
470 targeted CRISPRi (inhibit transcription initiation), finding that gene-targeting CRISPRi largely outperformed  
471 promoter-targeting CRISPRi. We also attributed phenotypic evidence to 141 known RegulonDB-annotated  
472 promoters and associated, to our knowledge, the first experimental evidence to four predicted promoters  
473 from RegulonDB. Finally, we explored phenotypic profiles associated with tandem promoter arrays and  
474 promoters that displayed strand-dependent knockdown success to conclude that targeting the NT-strand  
475 of the promoter closest to the target gene can yield more successful CRISPRi knockdowns in comparison  
476 to other promoter-mediated orientations for certain genomic contexts.

477  
478 While we demonstrated a high utility for microbial genome interrogation via CRISPRi-based screens in this  
479 work, CRISPRi still has a number of limitations. First, targeting in operons yields polar effects, thus limiting  
480 the analysis of essentiality to transcriptional units and assigning specific phenotypic confidence to only the  
481 last gene in the transcriptional unit. As such, CRISPRi should serve as a complementary method to  
482 transposon insertion and recombineering-based approaches, which are less prone to polar operon effects.  
483 Second, the compact organization of bacterial genomes yields architectures with overlapping or tightly  
484 spaced TFBS and promoter features. This makes it especially challenging to precisely attribute phenotypes  
485 to a specific TFBS (due to its proximity or overlap with other TFBSs and promoters). Precise genome editing  
486 methods such as MAGE and CREATE are likely more suitable for such cases. Regardless, the  
487 programmability of CRISPRi targeting can be used to uncover intergenic regions of phenotypic importance  
488 through tiled screens, which can be combined with TFBS and promoter predictions along with high-

489 throughput measurements (eg protein-DNA interactions, RNA-seq) to add annotation confidence for newly-  
490 sequenced microbes. Overall, the CRISPRi library developed here presents a resource of curated and  
491 phenotype-linked sgRNAs for use in *E. coli*, and the workflow developed here for interrogating genic and  
492 non-genic chromosomal features provides the basis for high-throughput CRISPRi studies in other bacteria.  
493

## 494 METHODS

495  
496 **Chemicals, reagents, and media:** LB Lennox Medium (EZMix™ powder microbial growth medium, Sigma  
497 Aldrich) was used to culture strains for experiments in rich media. M9 Minimal Medium (1X M9 salts, 2 mM  
498 MgSO<sub>4</sub>, 0.1 mM CaCl<sub>2</sub>, 0.4% glycerol) was used to culture strains for experiments in minimal media.  
499 Anhydrotetracycline (aTc; CAS 13803-65-1, Sigma-Aldrich) was used at 200 ng/mL to induce dCas9  
500 expression. Arabinose was used at 0.1% to induce sgRNAs. Antibiotic concentrations used were 100µg/mL  
501 for carbenicillin and 30µg/mL for kanamycin. Glucose was used at 0.2% in media for outgrowth of the library  
502 from a freezer aliquot. Casamino acids (0.2%) were also used in M9 Minimal Medium for select assays.  
503

504 **CRISPRi library design:** See [Supplementary Note 1](#) for details regarding sgRNA library design along with  
505 [Supplementary Table 1](#) for sgRNA feature annotations, sequence-level details, and a summary of  
506 category codes.  
507

508 **CRISPRi library construction:** To clone the sgRNA library, sgRNAs were amplified from the OLS oligo pool  
509 using primers 282 (5' CACATCCAGGTCTCTCCAT 3') and 284 (5'  
510 cacatccaggtctctCGGACTAGCCTTATTTAACTTG 3') using Phusion II HS and the following protocol: 98°C  
511 for 10 sec and 15 cycles of 98°C for 10 sec, 60°C for 30 sec, and 72°C for 20 sec followed by a final  
512 extension of 72°C for 5 min. The PCR reaction was purified using a Zymo DNA Clean & Concentrator kit  
513 and eluted in water. The purified library was cloned into the library receiver plasmid, pT154  
514 (<https://benchling.com/s/seq-YGEVpcmWzQjGfRrP8oDc>), via a golden gate reaction using BsaI and T7  
515 DNA ligase. The golden gate reaction product was purified using a Zymo DNA Clean & Concentrator kit,  
516 following the kit parameters for a plasmid cleanup. A derivative of *Escherichia coli* K-12 MG1655 (ET163:  
517 MG1655 FRT-kanR-FRT tetR-pTet-dCas9; <https://benchling.com/s/seq-Gxu6IV96FF6y8jycpTrU>) was  
518 used as the recipient strain for the sgRNA library. The purified library was electroporated into a competent  
519 cell preparation of ET163 and maintained under carbenicillin (plasmid marker) and kanamycin (strain  
520 marker) selection. Aliquots of the resulting library were stored at -80°C.  
521

522 **CRISPRi fitness experiments:** An aliquot of the library was taken from storage at -80°C and thawed at room  
523 temperature. The aliquot was used to inoculate a 5 mL culture of LB Lennox media (LB) with carbenicillin,  
524 kanamycin, and glucose (multiple aliquots were used to inoculate distinct cultures for experiments with  
525 biological replicates). The culture was grown at 37°C until it reached OD<sub>600</sub> 0.5. A 4 mL aliquot was taken  
526 as an initial time point for the library (t<sub>0</sub> sample); this sample was centrifuged (Eppendorf 5810R) at 4000  
527 RPM (3202xg) and stored at -80°C. The remaining 1 mL of culture was centrifuged (Eppendorf 5417R) at  
528 8000xg and washed twice with 1 mL of LB media. 156 µL of this washed sample was added to 10 mL of  
529 LB media (~1:64 dilution) with arabinose (0.1%), aTc (200 ng/mL), carbenicillin (100µg/mL), and kanamycin  
530 (30µg/mL). Technical replicates were generated by dividing this initial culture into 5 mL cultures. Cultures  
531 were grown at 37°C until they reached OD<sub>600</sub> ~0.5, indicating 6 population doublings of the library. The  
532 library was again diluted 1:64 into 5 mL of LB media with arabinose, aTc, carbenicillin, and kanamycin and  
533 grown at 37°C until the culture reached OD<sub>600</sub> ~0.5. This process was repeated until the library had  
534 undergone a total of 24 population doublings under induction. After 24 population doublings, the sample  
535 was centrifuged (Eppendorf 5810R) at 4000 RPM (3202xg) and stored at -80°C.  
536

537 For experiments in minimal media, the original freezer aliquot of the library was inoculated in M9 media  
538 with glycerol (0.4%), glucose (0.2%), carbenicillin, and kanamycin. For induction of the CRISPRi system,  
539 the library was cultured in M9 media with glycerol, arabinose, aTc, carbenicillin, and kanamycin. Casamino  
540 acids (0.2%) were added depending on the assay condition.

541  
542 For time-series experiments, samples were collected every doubling after the t0 sample was taken for the  
543 first 12 doublings, after which samples were collected every two doublings until the library had undergone  
544 a total of 18 doublings. During the experiment, the library was maintained between OD600 ~0.25 and ~0.50.

545  
546 **CRISPRi sequencing library preparation:** Frozen, centrifuged samples from fitness experiments were taken  
547 from storage at -80°C and thawed at room temperature. The CRISPRi sgRNA library was isolated using a  
548 QIAprep® Spin Miniprep Kit. 10-20 ng of DNA from each sample was used for a PCR reaction to generate  
549 NGS-ready sequencing samples in a 50 µL reaction using Phusion polymerase and two primers to add one  
550 of two sets of indexed Illumina adaptors. The first set contained a constant reverse primer and a variable  
551 forward primer with sample-specific 8 nucleotide barcodes that were sequenced “in-line” during an Illumina  
552 sequencing read. The second primer set contained a constant forward primer and a variable reverse primer  
553 with sample-specific indices that could be sequenced during an indexing read ([Supplementary Table 1d](#)).  
554 Both primer sets yielded comparable sequencing results; however, we eventually shifted to using the  
555 second primer set as the data could be readily demultiplexed using Illumina software.

556  
557 Each reaction was performed using the following protocol: 98°C for 30 sec and 21 cycles of 98°C for 10  
558 sec, 67°C for 15 sec, and 72°C for 10 sec followed by a final extension of 72°C for 5 min. 5 µL of each PCR  
559 sample was pooled and purified using a Zymo DNA Clean & Concentrator kit. The purified sample was  
560 quantified using the Qubit dsDNA HS assay kit and product size was confirmed using a Bioanalyzer 2100  
561 automated electrophoresis system (DNA 1000 Kit). Final samples were run on either an Illumina Miseq or  
562 HiSeq instrument (2000/2500; Vincent J. Coates Genomics Sequencing Laboratory, UC Berkeley). All  
563 relevant sequencing data have been deposited in the National Institutes of Health (NIH) Sequencing Read  
564 Archive (SRA) at <https://www.ncbi.nlm.nih.gov/bioproject/PRJNA559958> under Accession code  
565 PRJNA559958.

566  
567 **CRISPRi sequencing data analysis:** Sequencing runs were demultiplexed using standard Illumina software  
568 for samples using the second primer set or a custom python script (`demultiplex_fastq.py`) for samples using  
569 the first primer set. Demultiplexed reads were processed using the following set of custom python scripts:  
570 `trim_sgRNA_reads.py` to trim and filter reads according to quality thresholds; `bwa_samtools.py` to map the  
571 trimmed sgRNA reads to a BWA index of the sgRNA library; `parse_bam.py` to convert mapped reads to a  
572 table of counts that represent the abundance of each sgRNA in the sample. Custom scripts for analysis are  
573 available at <https://github.com/hsrishi/HT-CRISPRi>.

574  
575 **CRISPRi fitness score calculation:** A small constant (i.e. pseudocount of 1) was added to the raw read  
576 counts to avoid errors in calculating fold-change in subsequent fitness calculations due to division by 0.  
577 These adjusted read counts for each sample were normalized by the median abundance for that sample,  
578 thus generating relative abundance (RA) values for each sgRNA library member and enabling comparisons  
579 between different samples. The fitness score was calculated as the log<sub>2</sub> ratio of the RA of a guide strain in  
580 a test condition relative to its RA in a control condition. In this framework, the test condition was a sample  
581 of the library after being subjected to grown over the course of an experiment, and the control condition  
582 was the t0 sample. The fitness scores from each sample were normalized such that the median fitness  
583 score for the sample was 0. In practice, library members with t0 raw read counts < 10 were filtered out to



584 limit variability due to low read depth. Significance values for each sgRNA fitness score were calculated via  
585 the edgeR package using raw read counts as the input<sup>46,47</sup>.

586

587 We also created a gene fitness score, which we calculated as the median of fitness values for all sgRNAs  
588 targeting a given gene. This provided a more stringent metric for quantifying strong fitness scores. For  
589 example, for a given gene with four sgRNAs, at least two guides would have to yield a strong fitness score  
590 in order for the median to be lower than -2. Fitness scores for all relevant experimental samples are listed  
591 in [Supplementary Table 10](#).

592

### 593 **AUTHOR CONTRIBUTIONS**

594 H.S.R. led the experimental work and computational analyses. H.S.R., E.T., and A.P.A designed  
595 experiments. E.T. cloned the CRISPRi library and performed initial experiments. H.L. and X.W. designed  
596 the sgRNA library. A.P.A. supervised the research. All authors contributed to manuscript preparation. L.S.Q.  
597 and A.P.A. conceived of the research.

598

### 599 **ACKNOWLEDGEMENTS**

600 The authors would like to thank (1) Agilent Technologies for providing the sgRNA library, (2) members of  
601 the Arkin lab, especially Vivek Mutalik and Morgan Price, for insightful discussions over the course of the  
602 work and during manuscript preparation, and (3) Guillaume Cambray and David Chen for initial help with  
603 Illumina NGS read processing. This work used the Vincent J. Coates Genomics Sequencing Laboratory at  
604 UC Berkeley. The authors would also like to acknowledge funding sources: Department of Energy Genome  
605 Science program - Office of Biological and Environmental Research [DE-SC008812, Funding Opportunity  
606 Announcement DE-FOA-0000640]; National Science Foundation (NSF) Graduate Research Fellowship (to  
607 H.S.R.); National Institutes of Health (NIH) Genomics and Computational Biology Training Program  
608 [5T32HG000047-18] (to H.S.R.). Funding for open access charge: DOE BER [DE-SC008812].

609

### 610 **COMPETING INTERESTS**

611 The authors declare no competing interests.

612

### 613 **REFERENCES**

614

- 615 1. Qi, L. S. *et al.* Repurposing CRISPR as an RNA-Guided Platform for Sequence-Specific Control of  
616 Gene Expression. *Cell* **152**, 1173–1183 (2013).
- 617 2. Peters, J. M. *et al.* A Comprehensive, CRISPR-based Functional Analysis of Essential Genes in  
618 Bacteria. *Cell* **165**, 1–39 (2016).
- 619 3. Liu, X. *et al.* High-throughput CRISPRi phenotyping identifies new essential genes in  
620 *Streptococcus pneumoniae*. *Molecular Systems Biology* **13**, 931–18 (2017).
- 621 4. Wang, T. *et al.* Pooled CRISPR interference screening enables genome-scale functional genomics  
622 study in bacteria with superior performance. *Nature Communications* **9**, 1–15 (2018).
- 623 5. Rousset, F., Cui, L., Siouve, E., Depardieu, F. & Bikard, D. Genome-wide CRISPR-dCas9 screens  
624 in *E. coli* identify essential genes and phage host factors. 1–31 (2018). doi:10.1101/308916
- 625 6. de Wet, T. J., Gobe, I., Mhlanga, M. M. & Warner, D. F. CRISPRi-Seq for the Identification and  
626 Characterisation of Essential Mycobacterial Genes and Transcriptional Units. 1–24 (2018).  
627 doi:10.1101/358275
- 628 7. Lee, H. H. *et al.* Functional genomics of the rapidly replicating bacterium *Vibrio natriegens* by  
629 CRISPRi. *Nature Microbiology* **4**, 1105–1113 (2019).
- 630 8. Gottesman, S. & Storz, G. Bacterial small RNA regulators: versatile roles and rapidly evolving  
631 variations. *Cold Spring Harbor Perspectives in Biology* **3**, a003798–a003798 (2011).
- 632 9. Ozbudak, E. M., Thattai, M., Lim, H. N., Shraiman, B. I. & van Oudenaarden, A. Multistability in the  
633 lactose utilization network of *Escherichia coli*. *Nature* **427**, 737–740 (2004).

- 634 10. Somvanshi, V. S. *et al.* A single promoter inversion switches *Phototaxis* between pathogenic  
635 and mutualistic states. *Science* **337**, 88–93 (2012).
- 636 11. Oren, Y. *et al.* Transfer of noncoding DNA drives regulatory rewiring in bacteria. *Proc. Natl. Acad.*  
637 *Sci. U.S.A.* **111**, 16112–16117 (2014).
- 638 12. Baba, T. *et al.* Construction of *Escherichia coli* K-12 in-frame, single-gene knockout mutants: the  
639 Keio collection. *Molecular Systems Biology* **2**, 1–11 (2006).
- 640 13. Wang, H. H. *et al.* Programming cells by multiplex genome engineering and accelerated evolution.  
641 *Nature* **460**, 894–898 (2009).
- 642 14. Warner, J. R., Reeder, P. J., Karimpour-Fard, A., Woodruff, L. B. A. & Gill, R. T. Rapid profiling of  
643 a microbial genome using mixtures of barcoded oligonucleotides. *Nat Biotechnol* **28**, 856–862  
644 (2010).
- 645 15. Freed, E. F. *et al.* Genome-Wide Tuning of Protein Expression Levels to Rapidly Engineer  
646 Microbial Traits. *ACS Synth. Biol.* **4**, 1244–1253 (2015).
- 647 16. Garst, A. D. *et al.* Genome-wide mapping of mutations at single-nucleotide resolution for protein,  
648 metabolic and genome engineering. *Nat Biotechnol* **35**, 1–12 (2016).
- 649 17. van Opijnen, T., Bodi, K. L. & Camilli, A. Tn-seq: high-throughput parallel sequencing for fitness  
650 and genetic interaction studies in microorganisms. *Nat Meth* **6**, 767–772 (2009).
- 651 18. Langridge, G. C. *et al.* Simultaneous assay of every *Salmonella* Typhi gene using one million  
652 transposon mutants. *Genome Research* **19**, 2308–2316 (2009).
- 653 19. Wetmore, K. M. *et al.* Rapid Quantification of Mutant Fitness in Diverse Bacteria by Sequencing  
654 Randomly Bar-Coded Transposons. *mBio* **6**, e00306–15–15 (2015).
- 655 20. Price, M. N. *et al.* Mutant phenotypes for thousands of bacterial genes of unknown function.  
656 *Nature* **557**, 503–509 (2018).
- 657 21. Fulco, C. P. *et al.* Systematic mapping of functional enhancer-promoter connections with CRISPR  
658 interference. *Science* **354**, 769–773 (2016).
- 659 22. Xie, S., Duan, J., Li, B., Zhou, P. & Hon, G. C. Multiplexed Engineering and Analysis of  
660 Combinatorial Enhancer Activity in Single Cells. *Molecular Cell* **66**, 285–299.e5 (2017).
- 661 23. Simeonov, D. R. *et al.* Discovery of stimulation-responsive immune enhancers with CRISPR  
662 activation. *Nature* **549**, 111–115 (2017).
- 663 24. Zhu, S. *et al.* Genome-scale deletion screening of human long non-coding RNAs using a paired-  
664 guide RNA CRISPR-Cas9 library. *Nat Biotechnol* **34**, 1279–1286 (2016).
- 665 25. Liu, S. J. *et al.* CRISPRi-based genome-scale identification of functional long noncoding RNA loci  
666 in human cells. *Science* **355**, eaah7111–16 (2017).
- 667 26. Joung, J. *et al.* Genome-scale activation screen identifies a lncRNA locus regulating a gene  
668 neighbourhood. *Nature* **548**, 343–346 (2017).
- 669 27. Gasperini, M. *et al.* A Genome-wide Framework for Mapping Gene Regulation via Cellular Genetic  
670 Screens. *Cell* **176**, 377–390.e19 (2019).
- 671 28. Kato, J.-I. & Hashimoto, M. Construction of consecutive deletions of the *Escherichia coli*  
672 chromosome. *Molecular Systems Biology* **3**, 966–7 (2007).
- 673 29. Osterman, A. L. & Gerdes, S. Y. *Microbial Gene Essentiality: Protocols and Bioinformatics*. **416**,  
674 (Humana Press, 2008).
- 675 30. Larson, M. H. *et al.* CRISPR interference (CRISPRi) for sequence-specific control of gene  
676 expression. *Nature Protocols* **8**, 2180–2196 (2013).
- 677 31. Gerdes, K. & Maisonneuve, E. Bacterial Persistence and Toxin-Antitoxin Loci. *Annu. Rev.*  
678 *Microbiol.* **66**, 103–123 (2012).
- 679 32. Kint, C. I., Verstraeten, N., Fauvart, M. & Michiels, J. New-found fundamentals of bacterial  
680 persistence. *Trends in Microbiology* **20**, 577–585 (2012).
- 681 33. Verstraeten, N. *et al.* Obg and Membrane Depolarization Are Part of a Microbial Bet-Hedging  
682 Strategy that Leads to Antibiotic Tolerance. *Molecular Cell* **59**, 9–21 (2015).
- 683 34. Pedersen, K. & Gerdes, K. Multiple hok genes on the chromosome of *Escherichia coli*. *Mol.*  
684 *Microbiol.* **32**, 1090–1102 (1999).
- 685 35. Fuchs, J. A. & Karlström, H. O. Mapping of *nrdA* and *nrdB* in *Escherichia coli* K-12. *J. Bacteriol.*  
686 **128**, 810–814 (1976).
- 687 36. Garriga, X. *et al.* *nrdD* and *nrdG* genes are essential for strict anaerobic growth of *Escherichia coli*.  
688 *Biochem. Biophys. Res. Commun.* **229**, 189–192 (1996).

- 689 37. Haft, D. H. *et al.* TIGRFAMs and Genome Properties in 2013. *Nucleic Acids Res* **41**, D387–D395  
690 (2012).
- 691 38. Klumpp, S., Zhang, Z. & Hwa, T. Growth Rate-Dependent Global Effects on Gene Expression in  
692 Bacteria. *Cell* **139**, 1366–1375 (2009).
- 693 39. Deutschbauer, A. M. Mechanisms of Haploinsufficiency Revealed by Genome-Wide Profiling in  
694 Yeast. *Genetics* **169**, 1915–1925 (2005).
- 695 40. Ardell, D. H. & Kirsebom, L. A. The Genomic Pattern of tDNA Operon Expression in *E. coli*. *PLoS*  
696 *Comput Biol* **1**, e12–14 (2005).
- 697 41. Couturier, E. & Rocha, E. P. C. Replication-associated gene dosage effects shape the genomes of  
698 fast-growing bacteria but only for transcription and translation genes. *Mol. Microbiol.* **59**, 1506–  
699 1518 (2006).
- 700 42. Hunter, W. N. The non-mevalonate pathway of isoprenoid precursor biosynthesis. *Journal of*  
701 *Biological Chemistry* **282**, 21573–21577 (2007).
- 702 43. Wong, B. G., Mancuso, C. P., Kiriakov, S., Bashor, C. J. & Khalil, A. S. Precise, automated control  
703 of conditions for high- throughput growth of yeast and bacteria with eVOIVer. *Nature Publishing*  
704 *Group* **67**, 1–15 (2018).
- 705 44. Yan, B., Boitano, M., Clark, T. A. & Ettwiller, L. SMRT-Cappable-seq reveals complex operon  
706 variants in bacteria. *Nature Communications* **9**, 318–11 (2018).
- 707 45. Rousset, F. *et al.* Genome-wide CRISPR-dCas9 screens in *E. coli* identify essential genes and  
708 phage host factors. *PLoS Genet* **14**, e1007749–28 (2018).
- 709 46. Robinson, M. D., McCarthy, D. J. & Smyth, G. K. edgeR: a Bioconductor package for differential  
710 expression analysis of digital gene expression data. *Bioinformatics* **26**, 139–140 (2009).
- 711 47. McCarthy, D. J., Chen, Y. & Smyth, G. K. Differential expression analysis of multifactor RNA-Seq  
712 experiments with respect to biological variation. *Nucleic Acids Res* **40**, 4288–4297 (2012).
- 713

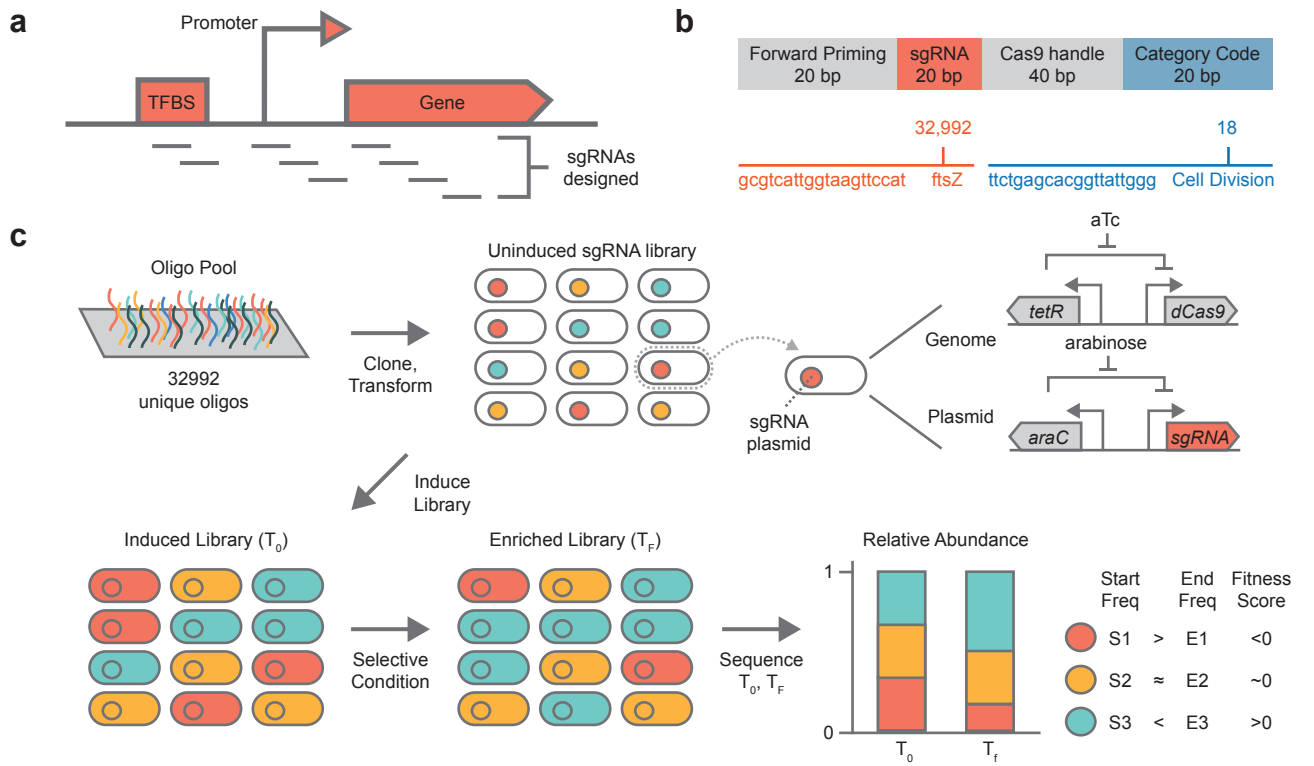

**Fig. 1 | Overview of CRISPRi screening platform.** **a** Guide sequences were designed to target three feature types on the *E. coli* genome: (i) gene sequences (ii) promoters (iii) transcription factor binding sites (TFBSs). Multiple guides were designed for each feature where possible (Methods). **b** Guide sequences were synthesized as oligos and ordered via Agilent Technologies as a pool. Category codes (short DNA barcodes) were included in designed oligos to enable amplification of subpools from the library. **c** Guides were first cloned into a receiver vector and transformed into a strain containing chromosomally integrated *dCas9*. At the beginning of an experiment the library is induced and an initial time-point ( $T_0$ ) is taken. After growth in a selective condition for a period of time a final time-point ( $T_F$ ) is taken. The initial and final samples are sequenced and the fitness of each library member is calculated.



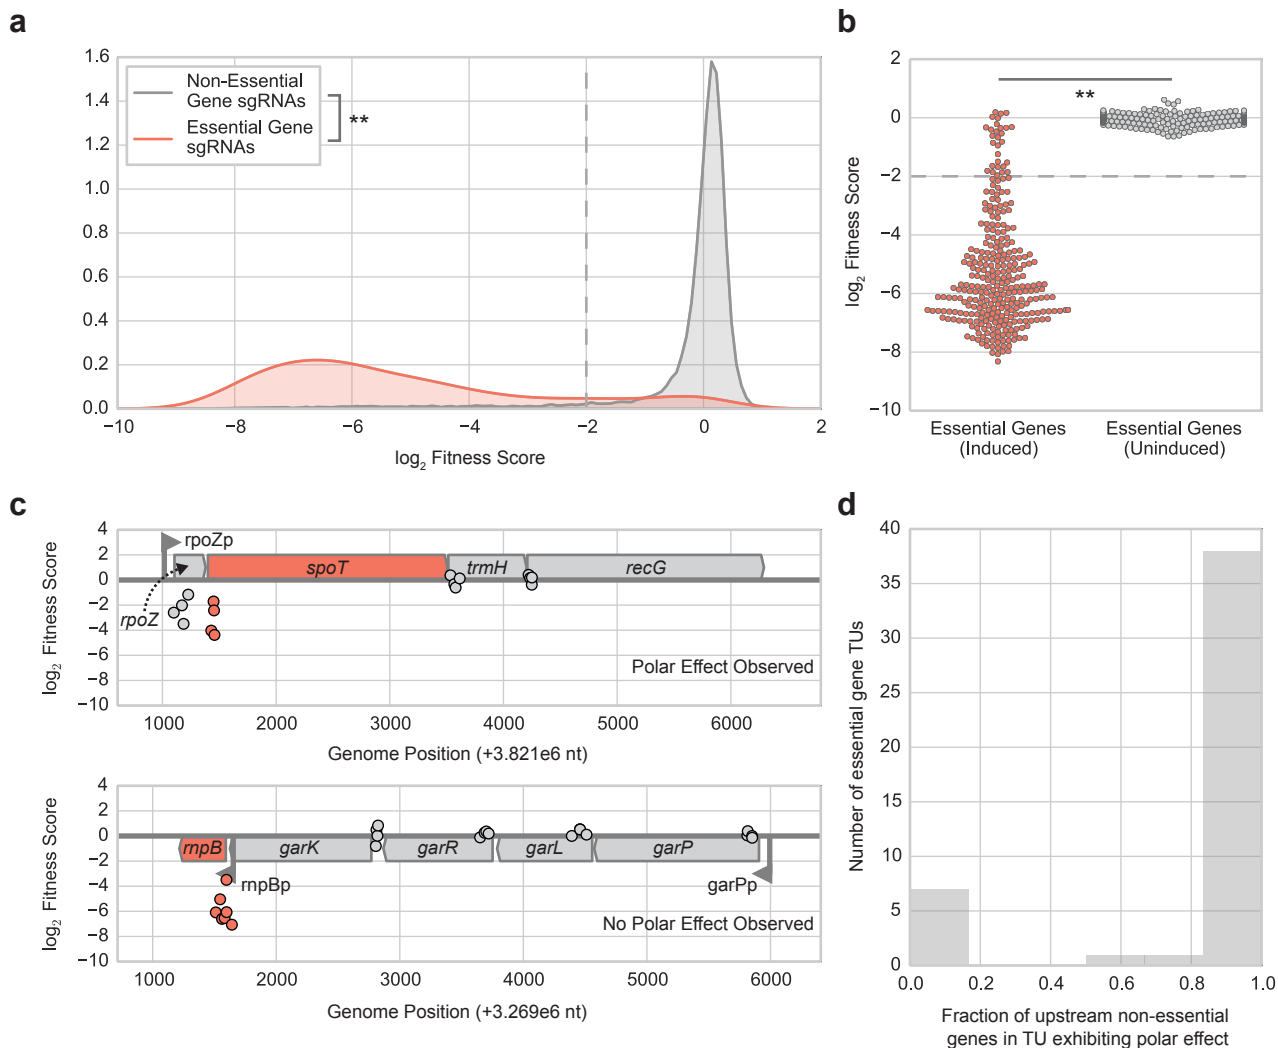

**Fig. 2 | Technology validation of CRISPRi screening platform.** **a** Depletion of essential gene targeting sgRNAs compared to non-essential gene targeting sgRNAs over the course of a pooled fitness experiment with the CRISPRi library in LB rich media (with CRISPRi system induced) under aerobic growth conditions for 24 population doublings.  $**p < 0.001$  (Mann-Whitney U-test); Cohen's  $d = 3.7$ . **b** Demonstration of tight, inducible control of sgRNA library via comparison of essential gene fitness scores from pooled fitness experiments where the CRISPRi library was either induced (left) or uninduced (right). In the induced condition, the library was induced with aTc and arabinose to express *dCas9* and sgRNA and then grown in LB media for 24 doublings as in a regular fitness experiment (Methods). In the uninduced condition, the library was also grown in similar culturing conditions (e.g. LB media for 24 doublings); however, neither aTc nor arabinose were added.  $**p < 0.001$  (Mann-Whitney U-test); Cohen's  $d = 3.7$ . **c** Example of CRISPRi-mediated polar operon effects where targeting a non-essential gene (*rpoZ*) upstream of an essential gene (*spoT*) in the same transcriptional unit (*rpoZ-spoT-trmH-recG*) produces a fitness defect (top panel). In the presence of an intra-operonic promoter (eg *rmpB*), knockdown of upstream non-essential genes (*garK*, *garR*, *garL*, *garP*) in the same transcriptional unit (*garP-garL-garR-garK-rmpB*) does not produce a fitness defect because essential gene expression can be rescued by the intra-operonic promoter (bottom panel). Targeting the intra-operonic promoter (*rmpB*) or essential gene (*rmpB*) itself does produce a fitness defect. Each dot represents an sgRNA (centered at midpoint of chromosomal target) targeting either an essential (red-orange) or non-essential (gray) gene. **d** Fraction of non-essential genes upstream of an essential gene within the same transcriptional unit (TU) that also show a fitness defect when knocked down, likely indicating a CRISPRi-mediated polar operon effect.

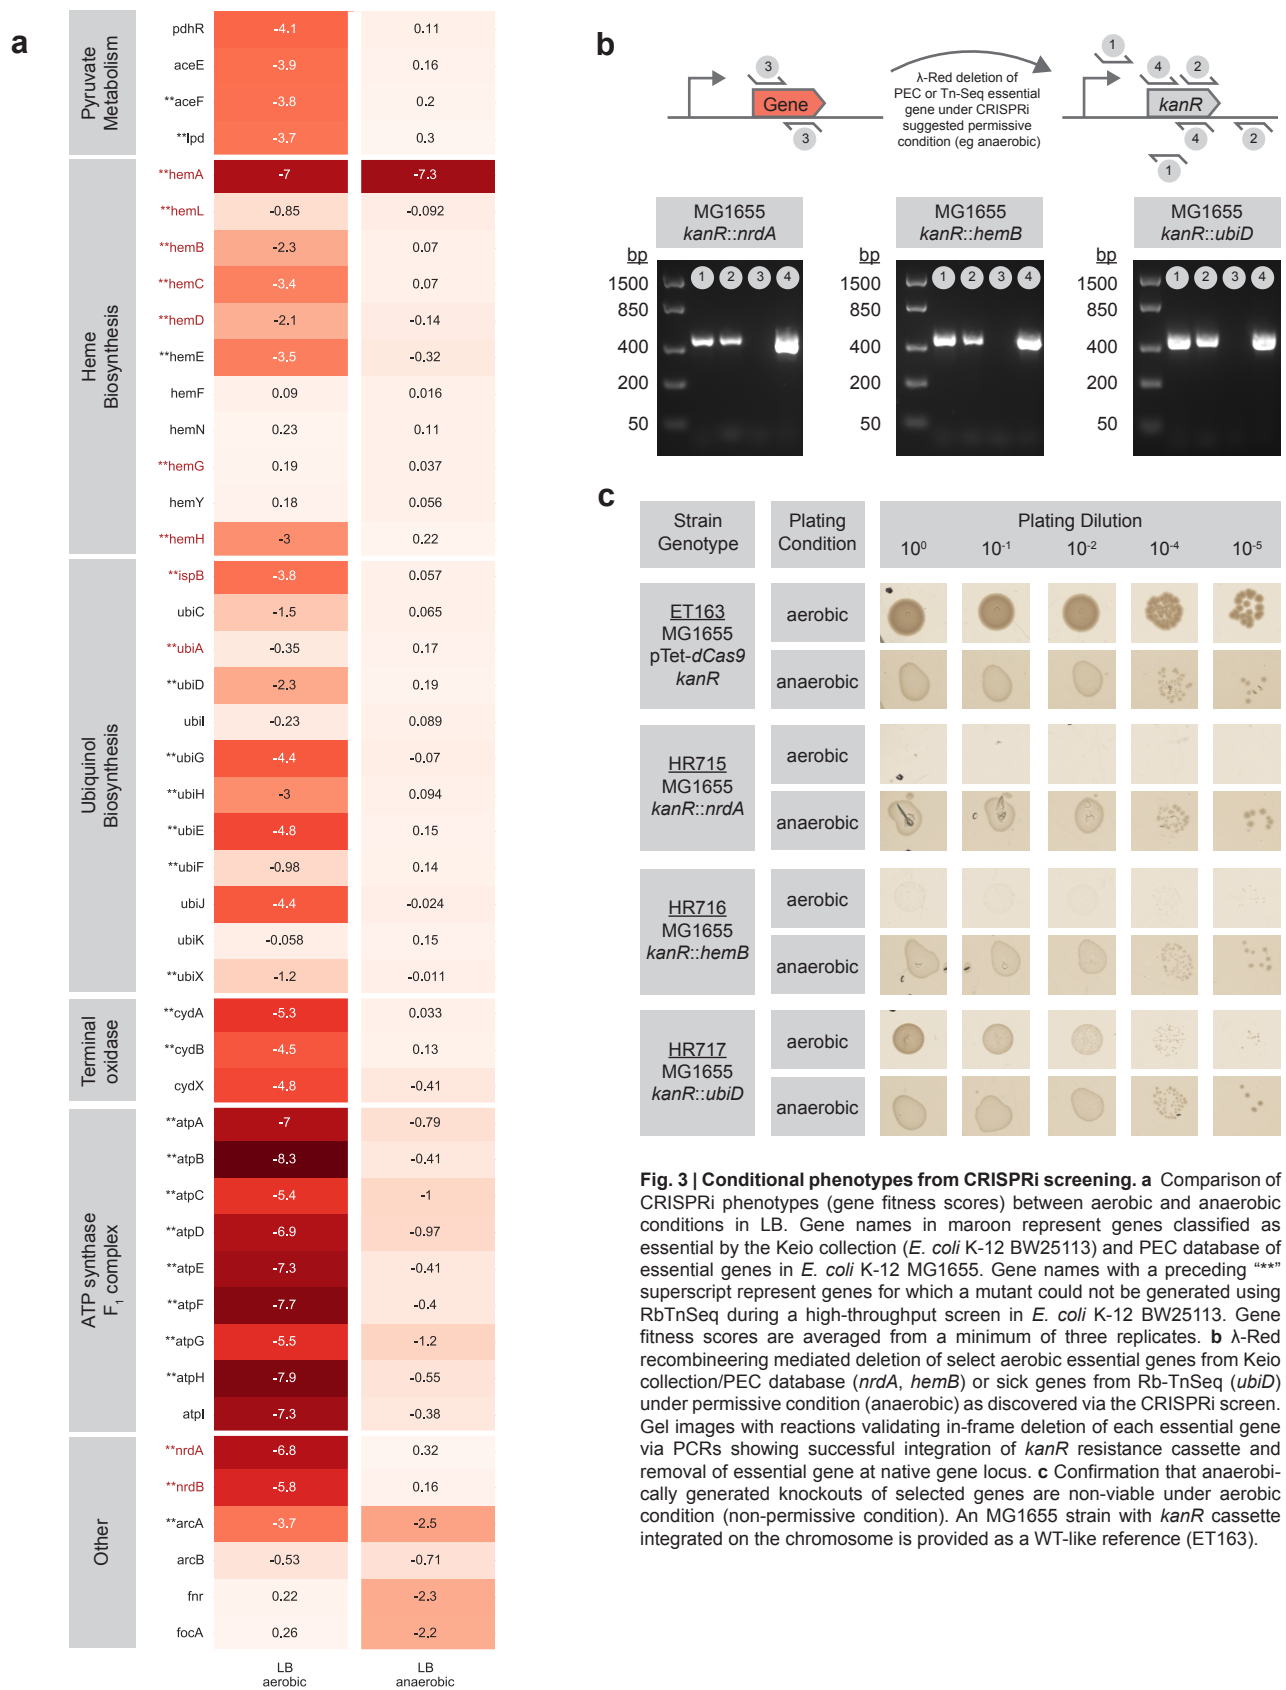

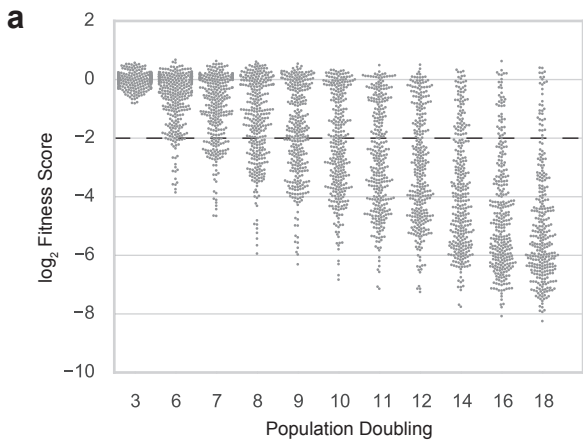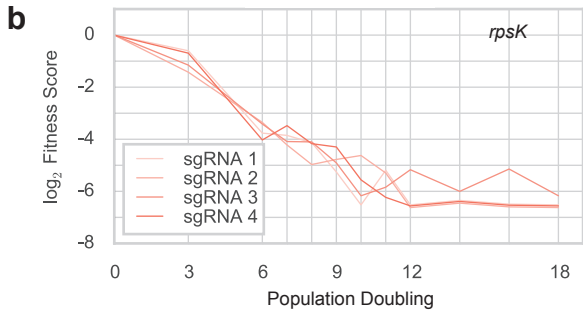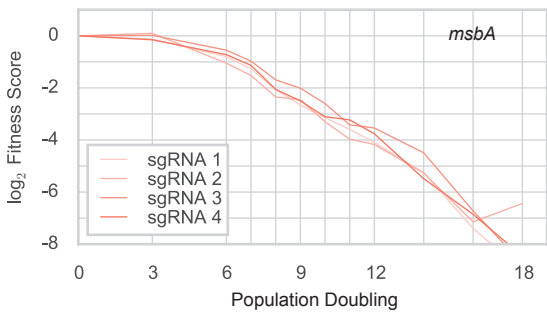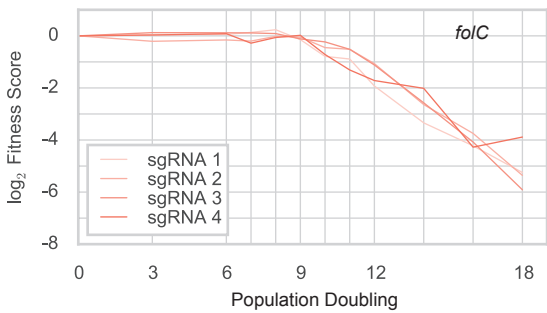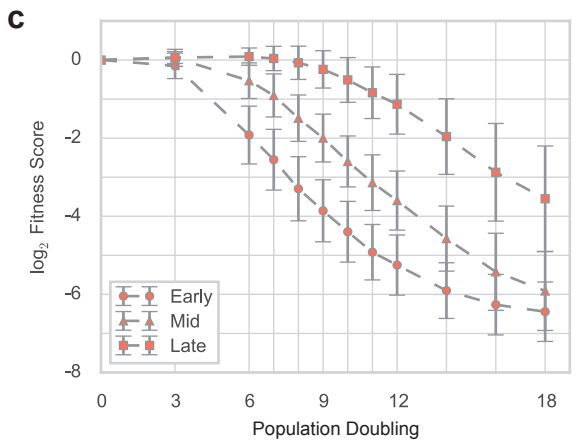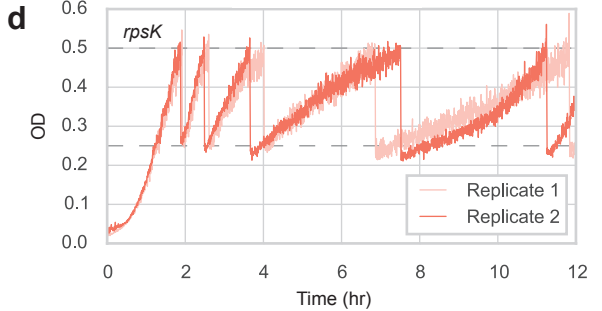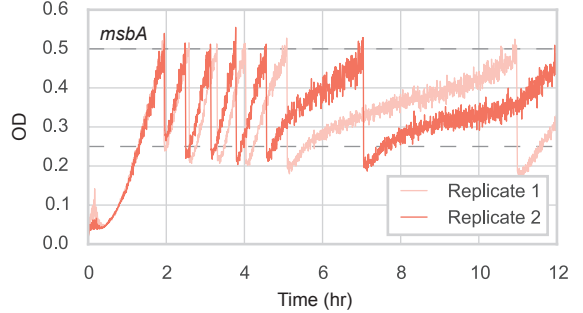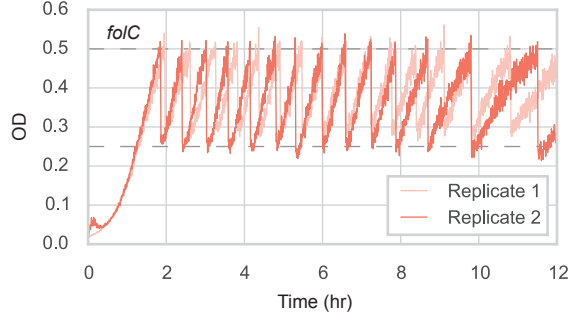

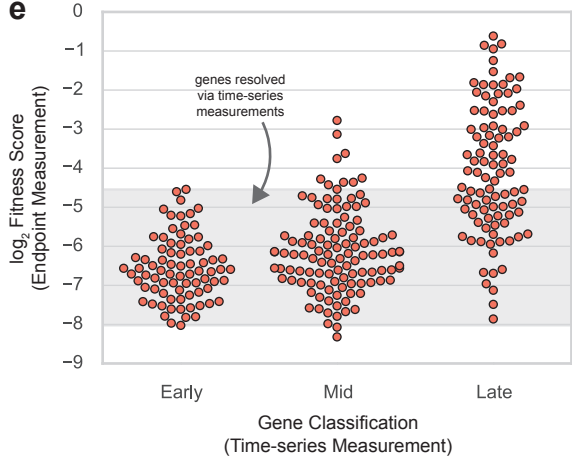

**Fig. 4 | Temporal knockdown profiling of CRISPRi library.** **a** Gene fitness scores for PEC essential genes ( $n=304$ ) from pooled CRISPRi experiment calculated at progressive timepoints (e.g. population doubling 3, 6, 7...) relative to initial timepoint ( $T_0$ ). **b** Example temporal trajectories constructed from pooled CRISPRi experiment depicting one of three characteristic profiles observed for essential genes from K-means clustering. Each line represents an sgRNA for annotated gene (Early - *rpsK*, Mid - *msbA*, Late - *folC*). **c** Grouping of essential genes into classes (Early, Mid, Late) from K-means clustering and depiction of resulting composite growth curves. Each curve corresponds to an essential gene class with each solid marker (circle, triangle, square) denoting the mean fitness score of genes (averaged across two replicates) with that essential gene class at a given population doubling ( $n_{\text{Early}} = 78$ ,  $n_{\text{Mid}} = 114$ ,  $n_{\text{Late}} = 95$ ; error bars represent  $\pm 1$  standard deviation). **d** Growth curves of CRISPRi strains for candidate genes from each essential gene class as measured on eVOLVER, an automated turbidostat. For each selected essential gene, an sgRNA targeting that gene was selected from the CRISPRi library and cloned into a strain expressing dCas9. An uninduced culture of each strain was inoculated into the eVOLVER and grown until OD 0.50 in LB + antibiotics (carb/kan) media without inducers. Upon reaching this setpoint, each strain was diluted to OD 0.25 with LB + antibiotics (carb/kan) + inducers (aTc, arabinose) media and then allowed to grow between OD 0.25 and 0.50 with fresh inducer media being used for subsequent dilutions. Two replicates were grown for each CRISPRi gene strain. **e** Demonstration of additional resolution provided by time-series measurements (x-axis) in comparison to endpoint fitness measurements taken after 24 population doublings of the library (y-axis). Shaded region contains 219 essential genes for which stratification into gene classes provides additional phenotypic resolution.



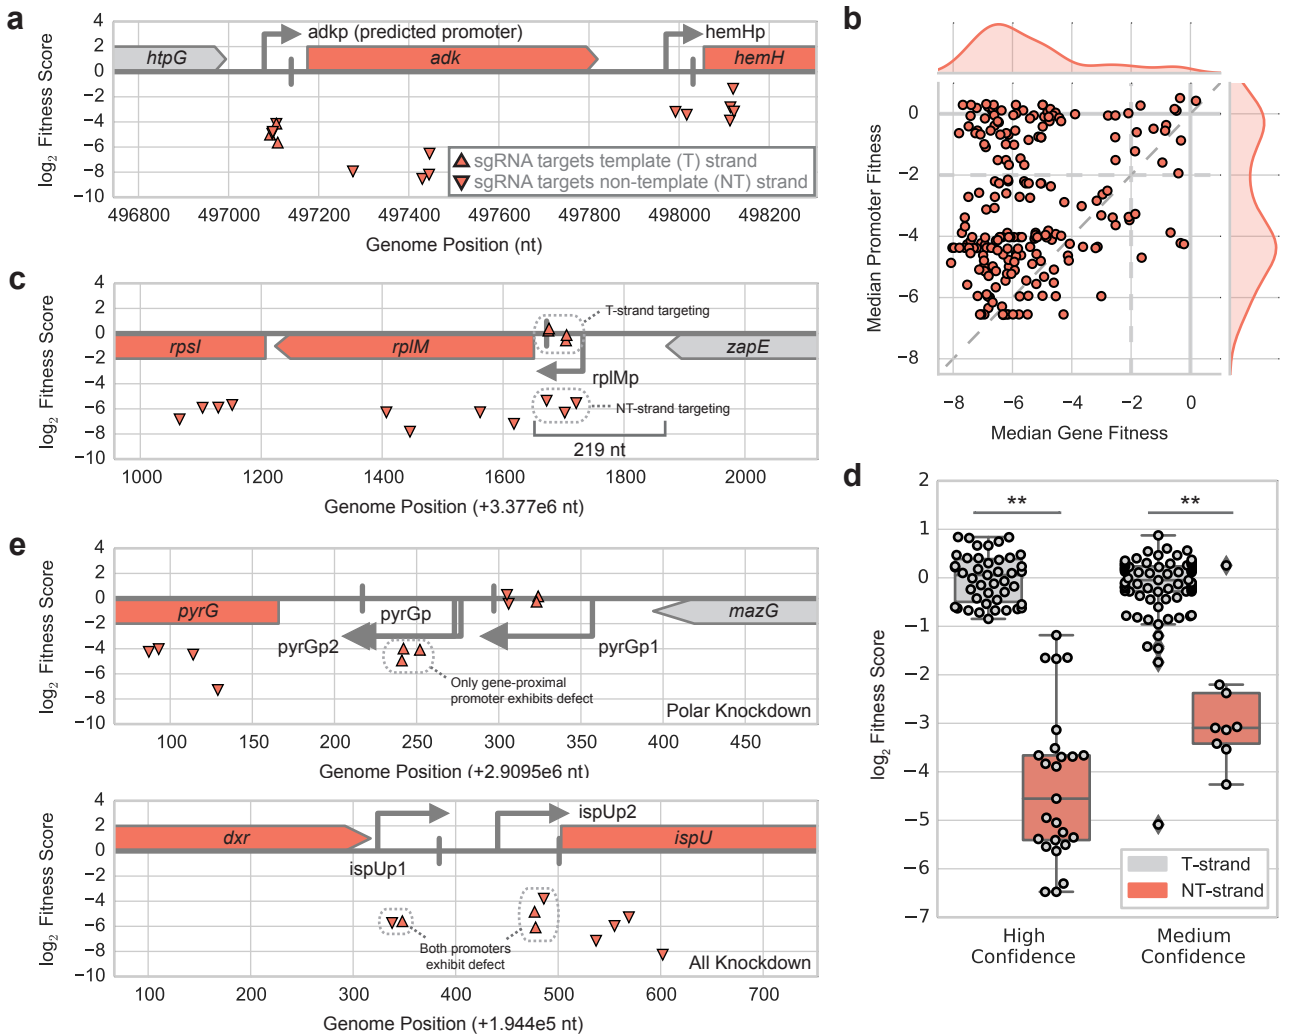

**Fig. 5 | Non-genic phenotypes from CRISPRi library.** **a** Demonstration of how CRISPRi fitness data for promoter knockdowns can add experimental confidence to predicted promoters (eg *adkp*) and known promoters (eg *hemHp*) by confirming that targeting the promoter produces a similar phenotype (i.e. fitness outcome) in comparison to targeting its regulated gene (eg *adk* - *adk*; *hemHp* - *hemH*). **b** Comparison of efficacy of gene-targeting CRISPRi against promoter-targeting CRISPRi for gene expression knockdown. For all essential genes for which guides targeting both gene and promoter sequences were present in the library, the median of fitness scores for sgRNAs targeting the gene sequence (x-axis) is plotted against the median of fitness scores for sgRNAs targeting the promoter sequence (y-axis). Note that the thin diagonal dashed line represents  $y = x$ . **c** Depiction of strand-dependency of CRISPRi-mediated promoter knockdown for *rplM* driving expression of the *rplM-rpsL* operon. Only sgRNAs targeting the NT-strand of the promoter (relative to the gene) produce a fitness defect, while T-strand targeting sgRNAs do not. **d** Boxplots (with data points overlaid) showing strand dependent promoter CRISPRi for 12 high-confidence cases and 26 medium-confidence cases. Each case represents a TU and all of the promoters regulating it (Methods). \*\* $p < 0.001$  (Mann-Whitney U-test); Cohen's  $d = 4.3$  (left),  $3.2$  (right). **e** Phenotypic profiles of tandem promoter arrays where only knockdown of an essential-gene proximal promoter yields a CRISPRi-mediated growth defect (top) or where a knockdown of any promoter regulating the essential gene can yield a growth defect (bottom).

## Supplementary Information

### Table of Contents

#### Supplementary Figures

- Supplementary Figure 1: CRISPRi library replicability
- Supplementary Figure 2: CRISPRi library minimal media experiment
- Supplementary Figure 3: Investigation of bias in CRISPRi library
- Supplementary Figure 4: CRISPRi library amino acid auxotrophy experiment
- Supplementary Figure 5: Conditional phenotypes for *hok-sok* toxin-antitoxin system
- Supplementary Figure 6: Conditional phenotypes for NADH:quinone oxidoreductases
- Supplementary Figure 7: Workflow for CRISPRi time-series experiment
- Supplementary Figure 8: Analysis of gene product features on time-series gene classification
- Supplementary Figure 9: Time-series classification of all genes in CRISPRi library
- Supplementary Figure 10: eVOLVER profiling of ctrl and *ftsZ* CRISPRi strains
- Supplementary Figure 11: Examples of promoter-targeting guides more effective than gene-targeting guides
- Supplementary Figure 12: Comparison of promoter- and gene-targeting CRISPRi time series
- Supplementary Figure 13: CRISPRi knockdown of TFBSs regulating single essential gene promoters
- Supplementary Figure 14: Feature cofitness of *cydD* gene, promoter, and TFBS-targeting sgRNAs

#### Supplementary Tables

- Supplementary Table 1: CRISPRi library design details (separate attachment)
- Supplementary Table 2: List of genes with median gene fitness score > -2 (separate attachment)
- Supplementary Table 3: List of essential gene knockout validation strains (this file)
- Supplementary Table 4: Gene classification and ontological enrichment from time-series analyses (separate attachment)
- Supplementary Table 5: List of strains used for eVOLVER CRISPRi experiment (this file)
- Supplementary Table 6: Annotations for sgRNAs targeting promoters (separate attachment)
- Supplementary Table 7: Results from analysis of essential gene promoters (separate attachment)
- Supplementary Table 8: Comparison of transcription readthrough results with SMRT-Cappable Seq study (separate attachment)
- Supplementary Table 9: Annotations for sgRNAs targeting TFBSs (separate attachment)
- Supplementary Table 10: Fitness scores for relevant experimental samples (separate attachment)

#### Supplementary Notes

- Supplementary Note 1: sgRNA library design
- Supplementary Note 2: Analysis of time-series data

#### References (SI only)

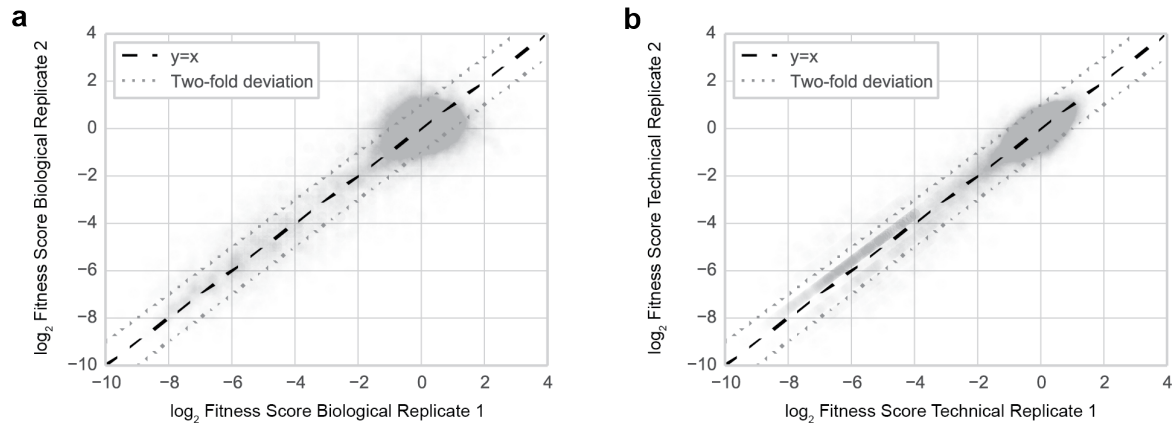

**Supplementary Fig. 1 | CRISPRi library replicability.** **a** Two biological replicates of a CRISPRi experiment where the library was grown in LB rich media. Each dot represents an sgRNA. A biological replicate represents a distinct library aliquot. **b** Two technical replicates of a CRISPRi experiment where the library was grown in LB rich media. Each dot represents an sgRNA. A technical replicate represents an aliquot of the library that was split prior to the start of the experiment.

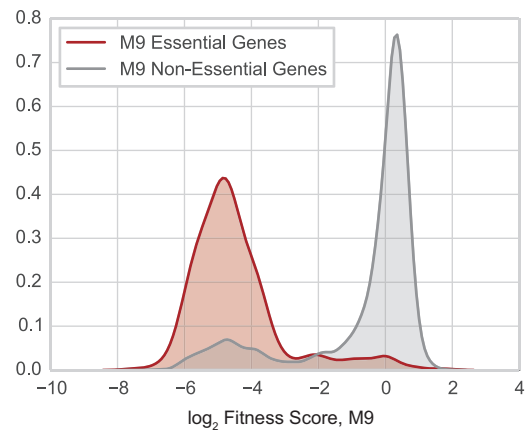

**Supplementary Fig. 2 | CRISPRi library minimal media experiment.** Depletion of minimal media (M9) essential gene targeting sgRNAs compared to non-essential gene targeting sgRNAs over the course of a pooled fitness experiment with the HT-CRISPRi library in M9 minimal media (with CRISPRi system induced) under aerobic growth conditions for 24 population doublings.

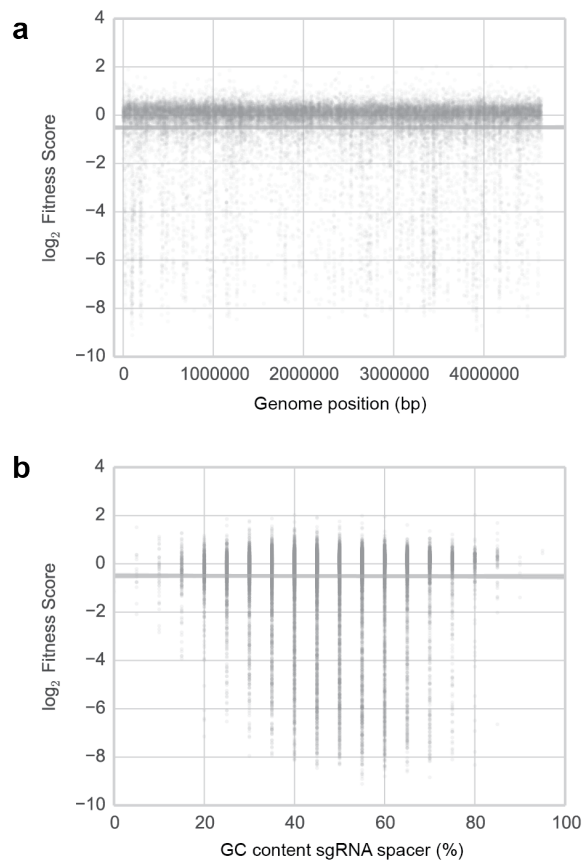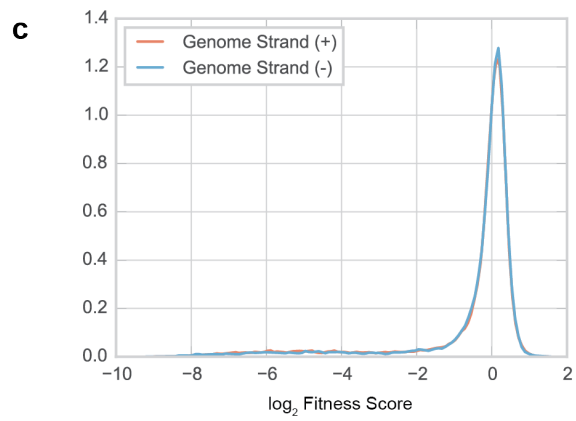

**Supplementary Fig. 3 | Investigation of bias in CRISPRi library. a** Genome position of library sgRNAs plotted against fitness of respective sgRNAs from a pooled experiment in LB media under aerobic conditions. Gray line represents linear relationship between fitness and genome position with 95% confidence interval. **b** GC content of sgRNA variable region for library sgRNAs plotted against fitness of respective sgRNAs from a pooled experiment in LB media under aerobic conditions. Gray line represents linear relationship between fitness and GC content of sgRNA spacer with 95% confidence interval. **c** Distribution of fitness scores for sgRNAs targeting features on the + or - strand of the genome.



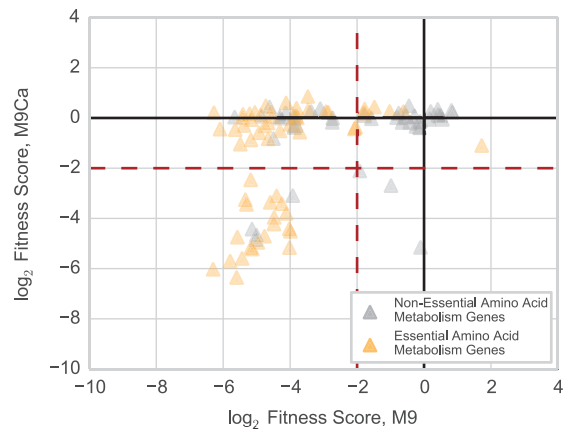

**Supplementary Fig. 4 | CRISPRi library amino acid auxotrophy experiment.** Depletion of amino acid biosynthetic gene targeting sgRNAs over the course of a pooled fitness experiment in either M9 minimal media (x-axis - M9) or M9 minimal media supplemented with casamino acids (y-axis - M9Ca) under aerobic growth conditions for 24 population doublings. Essential amino acid metabolism genes (yellow triangles) refer to genes classified as essential in Joyce et al *J Bacteriol* 2006 via screening of the Keio essential gene deletion collection on glycerol minimal medium.

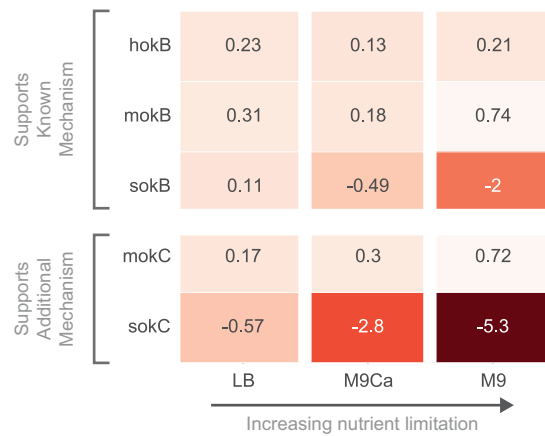

**Supplementary Fig. 5 | Conditional phenotypes for *hok-sok* toxin-antitoxin system.** Gene fitness scores for genes in the *hok-sok* toxin-antitoxin systems (B & C) showing increasing defect as a result of *sokB* and *sokC* knockdown under conditions of increasing nutrient limitation with *sokC* depicting a stronger phenotypic response than *sokB*. Mechanism for *hokB-sokB* is reported in Verstraeten et al *Molecular Cell* 2015. Nutrient conditions: LB (rich media), M9Ca (M9 minimal media supplemented with casamino acids), M9 (M9 minimal media). Gene fitness scores are averaged from a minimum of three replicates. Data from pooled fitness experiment with library grown for 24 population doublings under induction in stated condition.

|      |               |                 |               |                 |
|------|---------------|-----------------|---------------|-----------------|
| ndh  | -1            | -0.091          | 0.67          | 0.11            |
| nuoA | 0.078         | -1.6            | -4.2          | 0.15            |
| nuoB | 0.25          | -1.6            | -4.4          | 0.3             |
| nuoC | -0.35         | -2.2            | -4.4          | 0.25            |
| nuoE | 0.15          | -1.7            | -3.6          | 0.17            |
| nuoF | 0.053         | -2.7            | -4.8          | 0.15            |
| nuoG | -0.089        | -1.4            | -4.1          | 0.065           |
| nuoH | 0.094         | -1.8            | -4.4          | 0.11            |
| nuoI | 0.19          | -2.2            | -4.9          | 0.19            |
| nuoJ | 0.066         | -1.9            | -4.9          | 0.17            |
| nuoK | -0.11         | -1.6            | -3.9          | 0.16            |
| nuoL | 0.11          | -2.5            | -5.2          | 0.18            |
| nuoM | -0.0038       | -1.6            | -4.2          | 0.03            |
| nuoN | 0.024         | -1.8            | -5.2          | 0.15            |
|      | LB<br>aerobic | M9Ca<br>aerobic | M9<br>aerobic | LB<br>anaerobic |

**Supplementary Fig. 6 | Conditional phenotypes for NADH:quinone oxidoreductases.** Comparison of CRISPRi phenotypes (gene fitness scores) between aerobic conditions in LB, M9Ca, and M9 media against anaerobic condition in LB for NADH:quinone oxidoreductase I (NDH-1; *nuo* genes) and NADH:quinone oxidoreductase 2 (NDH-II; *ndh*). Gene fitness scores are averaged from a minimum of three replicates. Data from pooled fitness experiment with library grown for 24 population doublings under induction in stated condition.

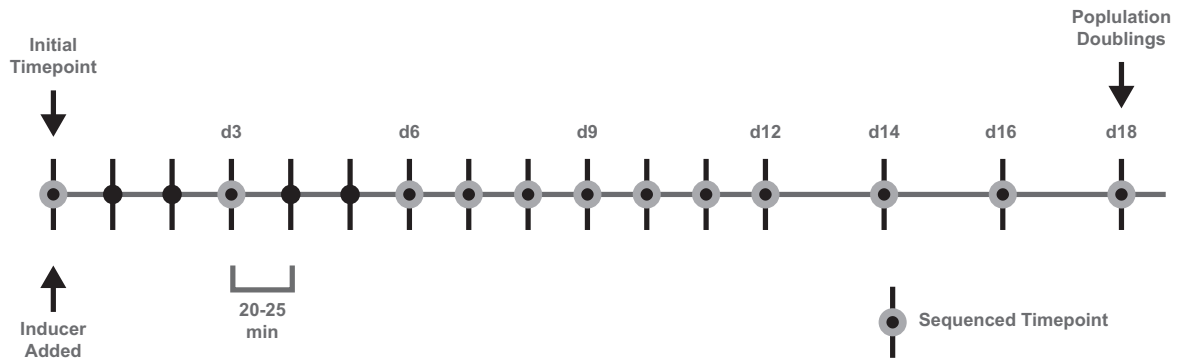

**Supplementary Fig. 7 | Workflow of CRISPRi time-series experiment.** The library was induced and an initial timepoint was taken. Samples of the library were taken every population doubling for the first 12 doublings and then every other doubling until population doubling 18. Timepoints with gray circles were sequenced.

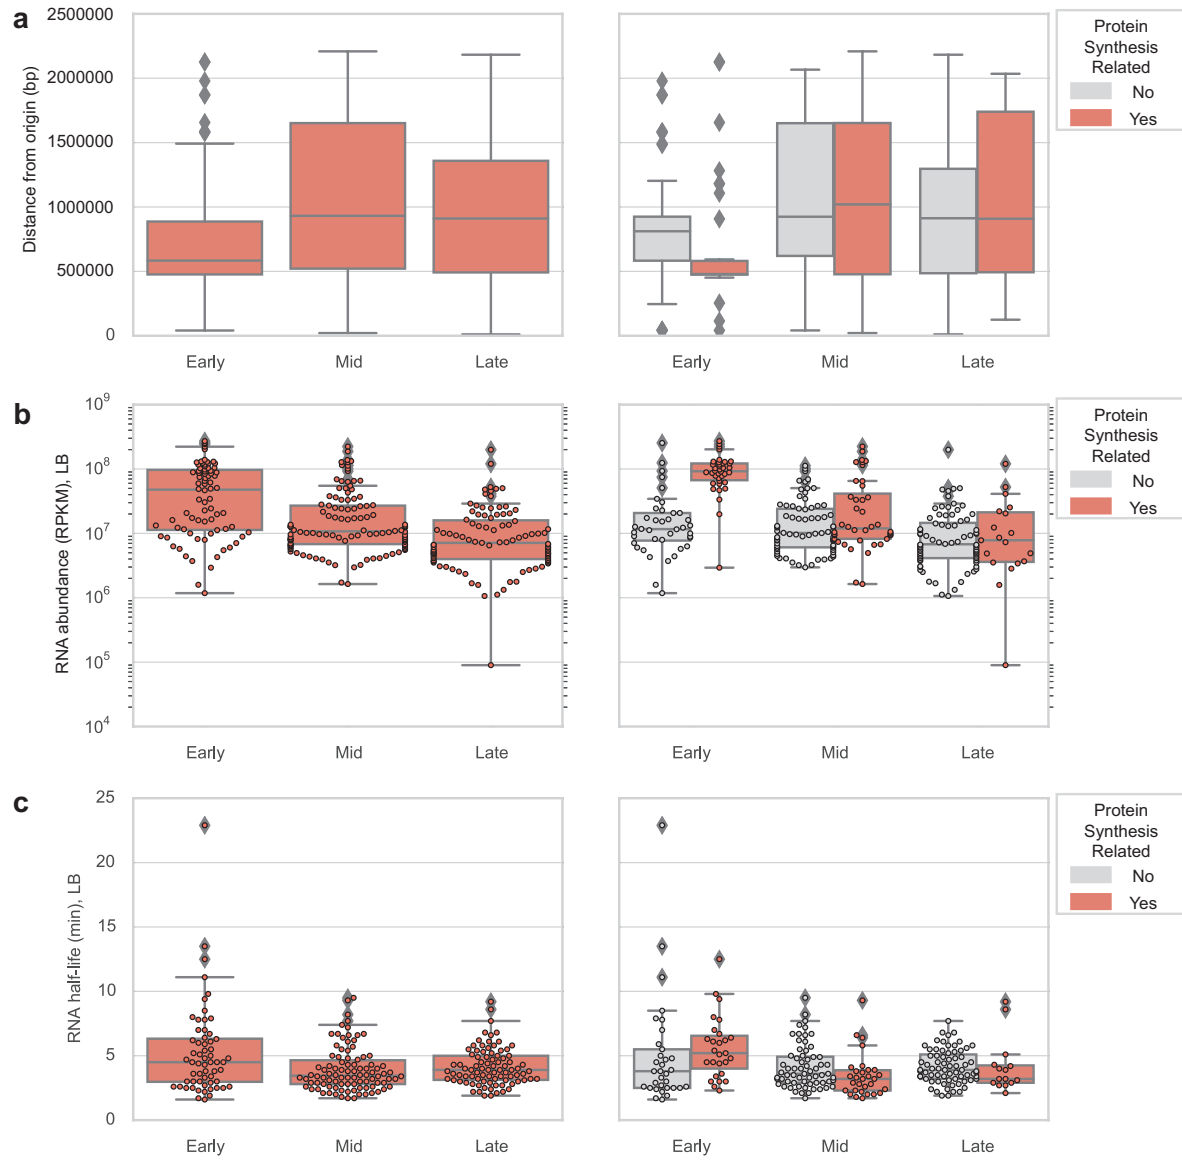



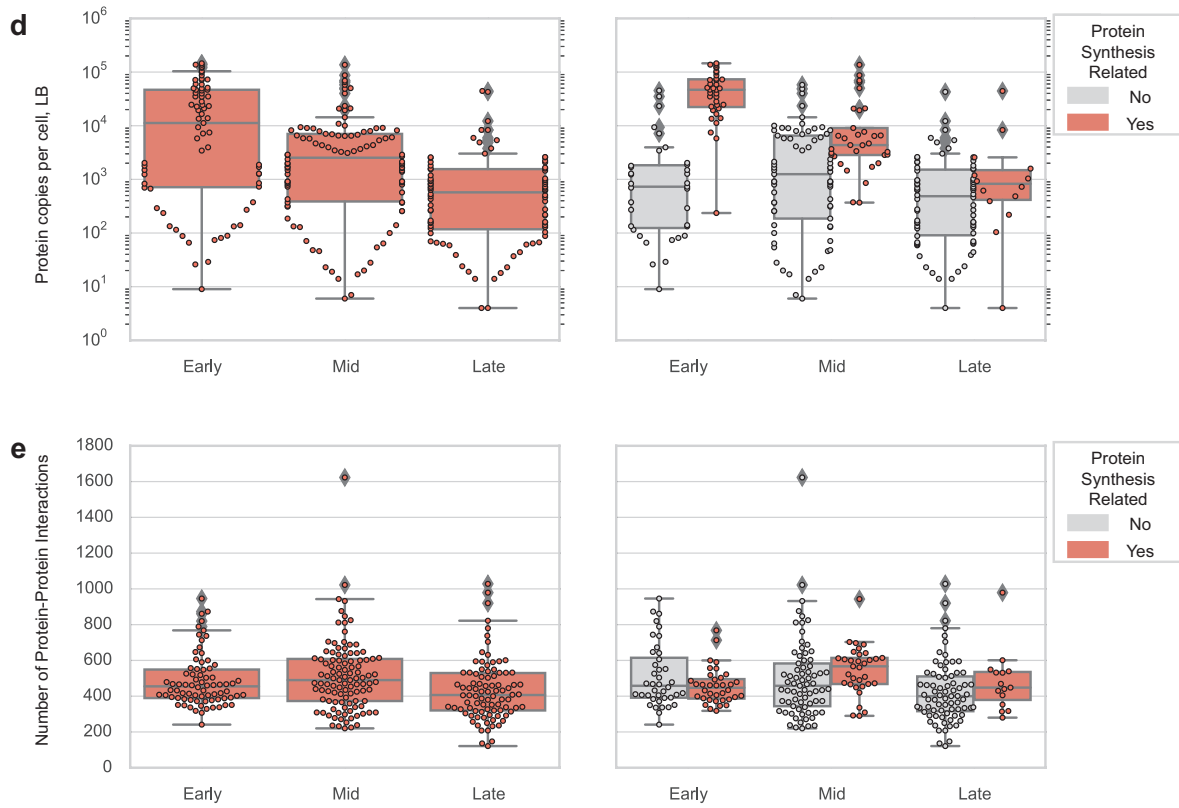

**Supplementary Fig. 8 | Analysis of gene product features on time-series gene classification.** Comparison of effect of (a) distance of gene start position from origin of replication, (b) RNA abundance in LB media, (c) RNA half-life in LB media, (d) protein abundance, and (e) number of protein-protein interactions for genes in each essential gene class from time-series data. Essential gene class comparisons (left) are further decomposed into subgroups of genes related (or not) to protein synthesis (right; protein synthesis related defined as corresponding TIGR Roles with leading descriptor "Protein synthesis" - e.g. "Protein synthesis:tRNA aminoacylation") to show if these genes are drivers of class-level trends. mRNA half-life data sourced from Venturelli et al *Nat. Comm.* 2017 GEO accession GSE94998. mRNA half-life data sourced from Bernstein et al *PNAS* 2002 Table 5. Protein abundance data sourced from Schmidt et al *Nat Biotechnol* 2016 Table S6. Protein-protein interaction data sourced from STRING database (string-db.org v10.5).

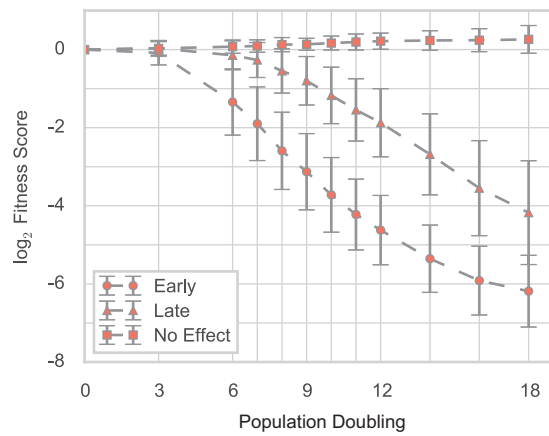

**Supplementary Fig. 9 | Time-series classification of all genes in CRISPRi library.** Grouping of all genes targeted in CRISPRi library into classes (Early, Late, No Effect) from K-means clustering and depiction of resulting composite growth curves. Each curve represents a gene class with each solid marker (circle, triangle, square) denoting the mean fitness score of genes (averaged across two replicates) with that gene class at a given population doubling ( $n_{\text{Early}} = 188$ ,  $n_{\text{Late}} = 218$ ,  $n_{\text{No Effect}} = 4046$ ; error bars represent  $\pm 1$  standard deviation).

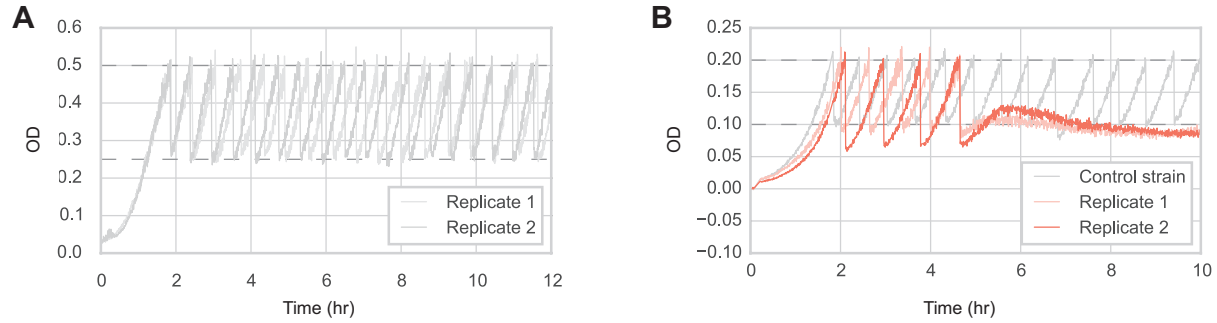

**Supplementary Fig. 10| eVOLVER profiling of control and *ftsZ* CRISPRi strains.** **a** eVOLVER growth curves of two replicates of a CRISPRi strain expressing dCas9 and a control sgRNA that does not target any locus on the chromosome. An uninduced culture of the strain was inoculated into the eVOLVER and grown until OD 0.50 in LB + antibiotics (carb/kan) media without inducers, after which each strain was diluted down to OD 0.25 with LB + antibiotics (carb/kan) + inducers (aTc, arabinose) media and then allowed to grow between OD 0.25 and 0.50. **b** eVOLVER growth curves of replicate *ftsZ*-targeting CRISPRi strains. An sgRNA targeting *ftsZ* was selected from the CRISPRi library and cloned into a strain expressing dCas9. An sgRNA designed to not target any locus in the *E. coli* genome was also cloned into a strain expressing dCas9 and used as a reference control strain. An uninduced culture of each strain was separately inoculated into the eVOLVER and grown until OD 0.20 in LB + antibiotics (carb/kan) media without inducers, after which each strain was diluted down to OD 0.10 with LB + antibiotics (carb/kan) + inducers (aTc, arabinose) media and then allowed to grow between OD 0.10 and 0.20 for multiple generations until ~10 hours.

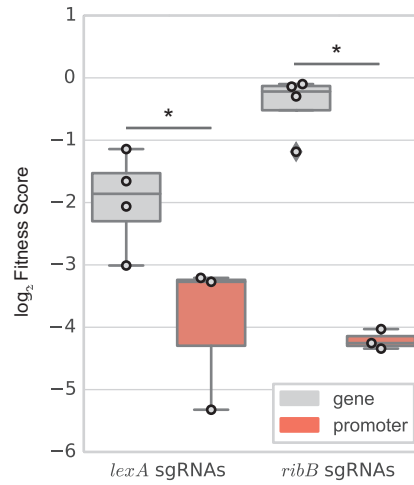

**Supplementary Fig. 11 | Examples of promoter-targeting guides more effective than gene-targeting guides.** Example case where promoter-targeting sgRNAs provide better knockdown of a known essential gene than functional gene-targeting sgRNAs (left - *lexA*) and gene-targeting sgRNAs that were unable to produce a fitness defect (right - *ribB*). \*p < 0.05 (Mann-Whitney U-test); Cohen's *d* = 2.4 (left), 10.7 (right).

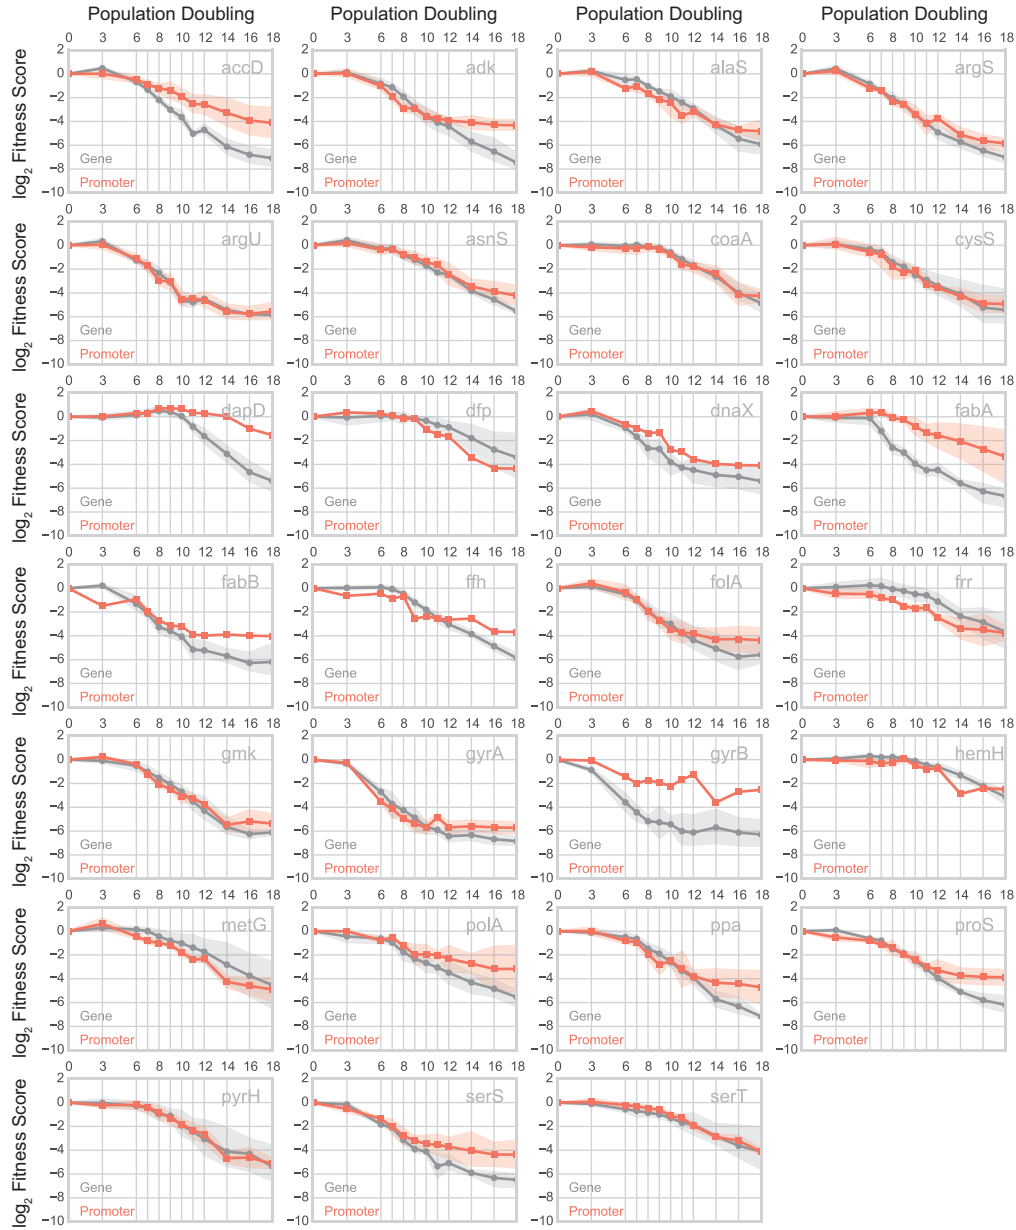



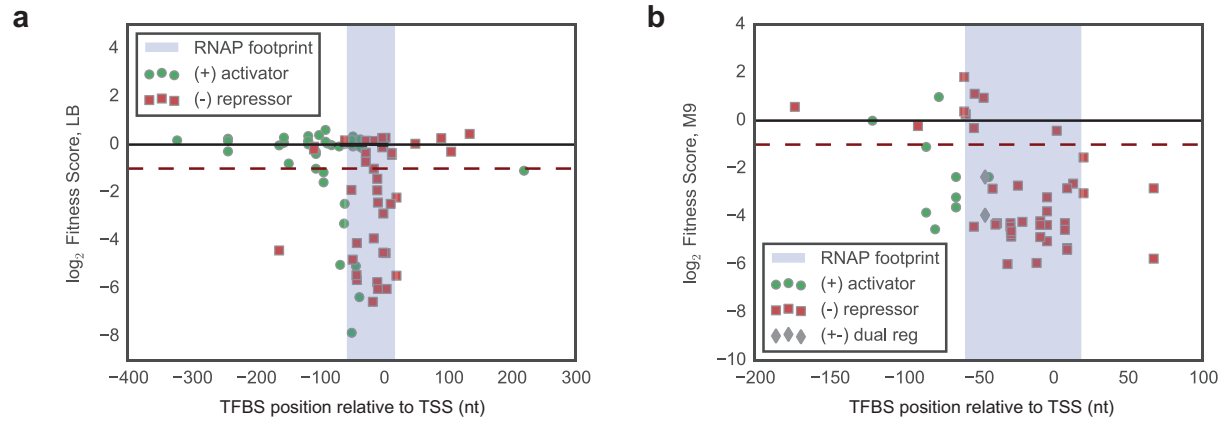

**Supplementary Fig. 13 | CRISPRi knockdown of TFBSs regulating single essential gene promoters.** **a** Fitness scores for sgRNAs targeting TFBSs regulating single promoters of transcription units containing at least one LB essential gene (as determined by PEC database). The RNAP footprint is defined as the window between -60 to +20 nt relative to the transcription start site (TSS) of the regulated promoter. Each object in the scatter plot represents the fitness of an sgRNA (y-axis) targeting a TFBS at a given distance from the TSS of the promoter it regulates (x-axis). A given TFBS can have a positive effect on gene expression (green circles), negative effect on gene expression (red squares), or dual effect on gene expression (gray diamonds) as determined by RegulonDB annotations. **b** Fitness scores for sgRNAs targeting TFBSs regulating single promoters of transcription units containing at least one M9 essential gene (as determined by Joyce et al *J Bacteriol* 2006).

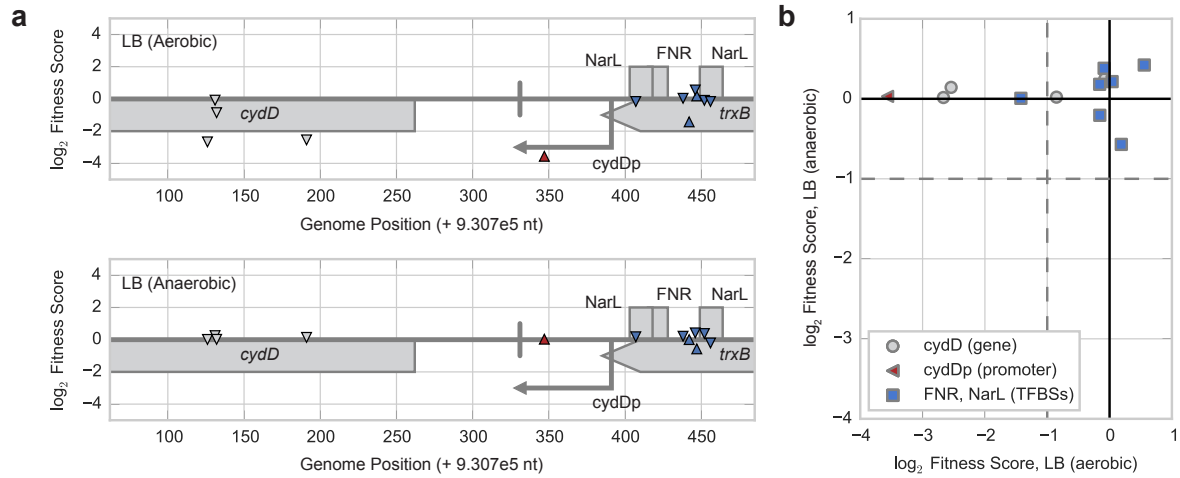

**Supplementary Fig. 14 | Feature cofitness of *cydD* gene, promoter, and TFBS-targeting sgRNAs.** **a** Fitness data for *cydD* gene, its corresponding promoter (*cydDp*), and TFBSs (NarL - gene expression activator, FNR - gene expression activator) regulating its promoter from fitness assays in LB media between aerobic (top panel) and anaerobic (bottom panel) conditions. Each triangle represents an sgRNA (centered at midpoint of chromosomal target) targeting either the chromosomal strand corresponding to the non-template (downward facing triangle) or template (upward facing triangle) strand of the *cydD* gene. **b** Scatter plot comparing conditional phenotypes for sgRNAs targeting *cydD* (gray circles), *cydD* promoter (red triangle), and *cydD* TFBSs (blue squares) between aerobic and anaerobic conditions.

**Supplementary Table 3. List of essential gene knockout validation strains**

| <b>Strain Number</b> | <b>Plasmid Name</b> | <b>Description</b> | <b>Host</b> | <b>Resistance</b> | <b>Link to Modified Sequence</b>                                                                                |
|----------------------|---------------------|--------------------|-------------|-------------------|-----------------------------------------------------------------------------------------------------------------|
| HR715                | n/a                 | <i>kanR::nrdA</i>  | MG1655 K-12 | Kan               | <a href="https://benchling.com/s/seq-LQ6uGkCQr09iU68FCnzh">https://benchling.com/s/seq-LQ6uGkCQr09iU68FCnzh</a> |
| HR716                | n/a                 | <i>kanR::hemB</i>  | MG1655 K-12 | Kan               | <a href="https://benchling.com/s/seq-Wu1pfiZX4M5Jlalfora">https://benchling.com/s/seq-Wu1pfiZX4M5Jlalfora</a>   |
| HR717                | n/a                 | <i>kanR::ubiD</i>  | MG1655 K-12 | Kan               | <a href="https://benchling.com/s/seq-XOLhFwSV5CbGRdp5i1Yt">https://benchling.com/s/seq-XOLhFwSV5CbGRdp5i1Yt</a> |

**Supplementary Table 5. List of strains used for eVOLVER CRISPRi experiment**

| <b>Strain Number</b> | <b>Plasmid Name</b> | <b>Description</b>      | <b>Host</b> | <b>Resistance</b> | <b>Link to Plasmid Sequence</b>                                                                                 |
|----------------------|---------------------|-------------------------|-------------|-------------------|-----------------------------------------------------------------------------------------------------------------|
| ET169                | pT169               | Pbad:control sgRNA      | ET163       | Amp, Kan          | <a href="https://benchling.com/s/seq-aLVjhEiBgyDQgeltKfg">https://benchling.com/s/seq-aLVjhEiBgyDQgeltKfg</a>   |
| ET170                | pT170               | Pbad: <i>ftsZ</i> sgRNA | ET163       | Amp, Kan          | <a href="https://benchling.com/s/seq-Zq5ApvVfBGbslqFt2RLW">https://benchling.com/s/seq-Zq5ApvVfBGbslqFt2RLW</a> |
| HR664                | pHR664              | Pbad: <i>rpsK</i> sgRNA | ET163       | Amp, Kan          | <a href="https://benchling.com/s/seq-s88pSK0iEeEyRJ7xwr6G">https://benchling.com/s/seq-s88pSK0iEeEyRJ7xwr6G</a> |
| HR665                | pHR665              | Pbad: <i>msbA</i> sgRNA | ET163       | Amp, Kan          | <a href="https://benchling.com/s/seq-JZWG9whqXzBqjFkrt4iA">https://benchling.com/s/seq-JZWG9whqXzBqjFkrt4iA</a> |
| HR666                | pHR666              | Pbad: <i>folC</i> sgRNA | ET163       | Amp, Kan          | <a href="https://benchling.com/s/seq-SqywQzhOAWZCmbDTgYHT">https://benchling.com/s/seq-SqywQzhOAWZCmbDTgYHT</a> |

## Supplementary Note 1. sgRNA library design

We designed the sgRNA library following rules described in Larson et al *Nature Protocols* 2013:

Selection of sgRNAs for oligo pool:

1. We first identified all 5'-XXXXX XXXXX XXXXX XXXXX NGG-3' sequences by searching both the sense and anti-sense strand of the genome, to generate the original pool of the potential sgRNA binding sites.
2. To avoid potential off-target effects, we mapped all 5'-XX XXXXX XXXXX-NGG-3' from step #1 back to the genome using the short reads mapping program Seqmap (<http://www-personal.umich.edu/~jianghui/seqmap/>) with parameter setting "1 /output\_all\_matches", and filtered out the sequences with multiple mappings.
3. We required that the designed sgRNAs should be able to fold properly. To check that this was true, we linked the 42nt scaffold sequence 5'-GTTTTAGAGCTAGAAATAGCAAGTTAAAATAAGGCTAGTCCG-3' to the 3' end of the 20 nt specific target binding sequence and checked the folding structure of this 62nt sequence by RNA secondary structure prediction using RNAfold (<http://www.tbi.univie.ac.at/~ronny/RNA/>) with default parameters. We only kept the ones that the scaffold region could fold to the hair-pin structure as reported in Jinek et al *Science* 2012.
4. Finally, we filtered out any sgRNA sequences containing the BsaI restriction site (GGTCTC), which we used for cloning purposes.

The sequences that passed these four steps composed our pool of potential sgRNAs. Next, we chose sgRNAs from the sgRNA pool to target all (1) annotated genes, (2) promoters and (3) TFBSs, according to RegulonDB.

1. sgRNAs that target coding sequences:

We tried to collect 4 sgRNAs for each annotated gene in the *E. coli* genome. We implemented a recursive approach to select sgRNAs as close to the ATG as possible and on the non-template strand for each gene. We first looked at the first 50%. Next, we looked at the annotated 5' UTR regions, and the ones close to the start codon were selected with higher priority. Finally, we looked at the last half of the CDS sequence, and chose the sites closer to the start codon with higher priority. By using this approach, 4281 genes could be targeted with 4 sgRNAs, 193 additional genes could be targeted by 1-4 sgRNAs, and 158 genes could not be targeted by any sgRNA.

We further looked at the 158 genes that could not be targeted by the previous pipeline. We noticed that 39 of them were located in operons where an upstream gene in that operon had properly selected sgRNAs.

For the rest 109 genes, we found many of them had closely related homologs on the genome, which caused the sgRNAs targeting these region to be not unique on the genome and could target both of the homologs. So we compared the sequences of all the annotated genes, and defined a homolog gene set by performing a megablast search with parameter setting of "-F F - D 3 -e 1e-10". We searched for the potential sgRNA target sites that locate in both the homolog genes but not any other sites on the genome. 48 genes could be targeted in this way.

Finally, there are 71 genes could not be targeted by our sgRNA design procedure. Most of them are small RNAs that don't have any PAM site.

Finally, we designed 17622 sgRNAs, which could target 4561 genes (4522 directly, 39 indirectly) on the *E.coli* genome.



2. sgRNA target promoters:

For the promoters that did not overlap with any annotated UTR or CDS regions, we selected the sgRNA from both the sense and anti-sense strand in the region from upstream 60 bp to downstream 10 bp relative to the transcription start site.

For the promoters located within a gene body, we only designed sgRNAs that binds to the template strand of that region. 14257 sgRNAs were selected to target 7404 Promoters.

3. sgRNA target TFBS sites:

We designed all the sgRNAs that could target the TFBSs annotated in the RegulonDB database. An sgRNA is selected if it could cover at least one-third of the annotated TFBS. If the TFBS is shorter than 15 bp, we required that the overlap should be at least 5bp. 1867 sgRNAs were selected to target 1264 TFBS sites.

4. sgRNA for subcategories:

a. We designed sgRNAs for 21 genes subcategories (eg cell division, small RNAs, central intermediary metabolism). These sgRNAs are encoded with an additional category code in the 3' end of each library oligo to enable amplification of subpools of the library. Categories and their corresponding category codes for amplification can be found in Supplementary Table 1.

We used the following external files as annotations for our sgRNA design:

- Genome sequence: Escherichia coli str. K-12 substr. MG1655, complete genome, NCBI Reference Sequence NC\_000913.2 ([http://www.ncbi.nlm.nih.gov/nuccore/NC\\_000913.2](http://www.ncbi.nlm.nih.gov/nuccore/NC_000913.2))
- Genome annotations from RegulonDB v8.1: ([http://regulondb.ccg.unam.mx/download/Data\\_Sets.jsp](http://regulondb.ccg.unam.mx/download/Data_Sets.jsp))
  - Gene coordinate: Gene\_sequence.txt
  - Promoter annotation: PromoterSet.txt
  - UTR annotation: UTR\_5\_3\_sequence.txt
  - Transcription factor binding sites: BindingSiteSet.txt

Note: To keep with genome annotation updates, sgRNAs were remapped to promoter and TFBS features using more recent RegulonDB annotations:

- Promoter annotation: PromoterSet.txt (RegulonDB v9.4; release date 05-08-2017)
- TFBS annotation: BindingSiteSet.txt (RegulonDB v10.5; release date 09-13-2018)

## Supplementary Note 2. Analysis of time-series data

The fitness of each sgRNA strain was calculated at each sequenced time point relative to the initial timepoint of the experiment. This constructed a time-series fitness curve for each sgRNA in the library.

### Time-series Analysis 1 – Clustering of Essential Genes:

1. Calculate gene fitness scores for each gene annotated as essential in the PEC database
2. Filter out any genes that did not have a gene fitness score  $\leq -1$  (i.e. keep only essential genes that showed a knockdown phenotype)
3. Keep only timepoints with a Pearson correlation  $\geq 0.8$  across two replicates
4. Average the remaining timepoints across replicates
5. Performed a min-max scaling of each timepoint (i.e. i.e. fitness values at each timepoint were scaled to between 0 and 1) from Step 4 to ensure that all timepoints were treated equally
6. Used the Elbow method to track the variation of the within-cluster-sum-of-squares (WCSS) with the number of clusters (k – ranging from 1 to 14) and found k = 3 to be the optimal number of clusters for K-means based on visual inspection.
7. Performed K-means clustering with selected k from Step 6 to classify essential gene curves
8. Visualize K-means clusters (Early / Mid / Late)

### Time-series Analysis 2 – Clustering of All Genes:

1. Calculate gene fitness scores for each gene targeted in the CRISPRi library
2. Keep only timepoints with a Pearson correlation  $\geq 0.8$  across two replicates
3. Average the remaining timepoints across replicates
4. Performed a min-max scaling of each timepoint (i.e. i.e. fitness values at each timepoint were scaled to between 0 and 1) from Step 3 to ensure that all timepoints were treated equally
5. Used the Elbow method to track the variation of the within-cluster-sum-of-squares (WCSS) with the number of clusters (k – ranging from 1 to 14) and found k = 3 to be the optimal number of clusters for K-means based on visual inspection.
6. Performed K-means clustering with selected k from Step 5 to classify essential gene curves
7. Visualize K-means clusters (Early / Late / No Effect)

### Gene Ontology Enrichment for Analysis 1 and 2:

For either time-series analysis, each gene was associated with its annotated TIGR Role. A hypergeometric test was carried out for each TIGR Role in each gene class (for analysis 1 – Early / Mid / Late; for analysis 2 – Early / Late / No Effect) with parameters: N = #total essential genes in data set, K = #total genes in class, n = #total genes with TIGR Role in data set, k = #genes with TIGR Role in class. The Benjamini-Hochberg correction was applied to the resulting p-values using the multitest function (parameter: “fdr\_bh”) in the statsmodels python module (<http://www.statsmodels.org/stable/index.html>). The threshold of  $p_{FDR-adjusted} \leq 0.05$  was used as the significance threshold.

### Time-series Analysis 3 – Comparison of gene-targeting and promoter-targeting CRISPRi:

1. Select all essential genes for which guides targeting the corresponding promoter and the gene itself were designed in the library
2. Of these promoter-gene pairs, select all essential genes that are the first and only gene in their respective transcription unit (TU). This enables association of a specific promoter knockdown or gene phenotype to the specific gene itself.
3. Of the remaining promoter-gene pairs, select cases where the gene only has one promoter
4. Keep only sgRNAs that had t0 counts  $\geq 10$  and had a fitness score  $\leq -1$  by the final timepoint (i.e. timepoint 15)
5. Plot time-series using lineplot function from seaborn plotting library (v0.9.0) with the parameter setting “ci = 95” to generate 95% confidence intervals via bootstrapping.
  - a. Lineplot function: <https://seaborn.pydata.org/generated/seaborn.lineplot.html>
6. For each gene, compare the overlap of the 95% confidence intervals between population doublings 6 and 12 (these timepoints were selected because they are both highly correlated across replicates and because after doubling 12 we start to see fitness scores leveling out due to limitations in sequencing read depth)

## References

1. Larson, M.H., Gilbert, L.A., Wang, X., Lim, W.A., Weissman, J.S. and Qi, L.S. (2013) CRISPR interference (CRISPRi) for sequence-specific control of gene expression. *Nature Protocols*, **8**, 2180–2196.
2. Jinek, M., Chylinski, K., Fonfara, I., Hauer, M., Doudna, J.A. and Charpentier, E. (2012) A Programmable Dual-RNA-Guided DNA Endonuclease in Adaptive Bacterial Immunity. *Science*, **337**, 816–821.
